# Supplementary material for: Single-atom catalysts reveal the dinuclear characteristic of active sites in NO selective reduction with NH3
Source: PubMed Central journal article supplement (PMC7093475; doi:10.1038/s41467-020-15261-5), 2020-03-24
Supplement: 41467_2020_15261_MOESM1_ESM.pdf [file 41467_2020_15261_MOESM1_ESM.pdf]

## Supplementary Information

### **Single-Atom Catalysts Reveal the Dinuclear Characteristic of Active Sites in NO Selective Reduction with NH<sub>3</sub>**

Qu et al.

---

## Contents

|                                                                                                                                                                                                                                                |          |
|------------------------------------------------------------------------------------------------------------------------------------------------------------------------------------------------------------------------------------------------|----------|
| <b>Supplementary Discussion</b> .....                                                                                                                                                                                                          | <b>3</b> |
| The structure of $\alpha$ -Fe <sub>2</sub> O <sub>3</sub> nanosheet .....                                                                                                                                                                      | 3        |
| Calculation on the number of the anchoring sites .....                                                                                                                                                                                         | 3        |
| Analysis of the STEM image .....                                                                                                                                                                                                               | 4        |
| H <sub>2</sub> -TPR.....                                                                                                                                                                                                                       | 4        |
| <b>Supplementary Tables</b> .....                                                                                                                                                                                                              | <b>6</b> |
| Supplementary Table 1. EXAFS analysis results of the samples .....                                                                                                                                                                             | 6        |
| Supplementary Table 2. The calculated area ratio of sub-bands derived from the deconvoluted H <sub>2</sub> -TPR profiles of $\alpha$ -Fe <sub>2</sub> O <sub>3</sub> and Mo <sub>1</sub> /Fe <sub>2</sub> O <sub>3</sub> .....                 | 7        |
| <b>Supplementary Figures</b> .....                                                                                                                                                                                                             | <b>8</b> |
| Supplementary Figure 1. SXRD patterns of Mo <sub>1</sub> /Fe <sub>2</sub> O <sub>3</sub> , $\alpha$ -Fe <sub>2</sub> O <sub>3</sub> , and $\alpha$ -MoO <sub>3</sub> .....                                                                     | 8        |
| Supplementary Figure 2. TEM, HRTEM images and structure model of $\alpha$ -Fe <sub>2</sub> O <sub>3</sub> nanosheets.....                                                                                                                      | 9        |
| Supplementary Figure 3. AC-STEM image of Mo <sub>1</sub> /Fe <sub>2</sub> O <sub>3</sub> .....                                                                                                                                                 | 10       |
| Supplementary Figure 4. XANES spectra of samples .....                                                                                                                                                                                         | 11       |
| Supplementary Figure 5. R-space and inverse FT spectra of samples.....                                                                                                                                                                         | 12       |
| Supplementary Figure 6. Raman spectra of samples .....                                                                                                                                                                                         | 13       |
| Supplementary Figure 7. Mo 3d XPS of samples .....                                                                                                                                                                                             | 14       |
| Supplementary Figure 8. Fe 2p XPS of samples.....                                                                                                                                                                                              | 15       |
| Supplementary Figure 9. DRIFT spectra of NH <sub>3</sub> adsorption on samples at 50°C .....                                                                                                                                                   | 16       |
| Supplementary Figure 10. DRIFT spectra of NH <sub>3</sub> adsorption on samples at 250°C .....                                                                                                                                                 | 17       |
| Supplementary Figure 11. $X_{NO}$ as a function of temperature over Mo <sub>1</sub> /Fe <sub>2</sub> O <sub>3</sub> with the different Mo loadings together with $\alpha$ -Fe <sub>2</sub> O <sub>3</sub> and $\alpha$ -MoO <sub>3</sub> ..... | 18       |
| Supplementary Figure 12. SCR performance as a function of temperature over Mo <sub>1</sub> /Fe <sub>2</sub> O <sub>3</sub> and $\alpha$ -Fe <sub>2</sub> O <sub>3</sub> .....                                                                  | 19       |
| Supplementary Figure 13. Effect of H <sub>2</sub> O and SO <sub>2</sub> on catalytic activity over Mo <sub>1</sub> /Fe <sub>2</sub> O <sub>3</sub> .....                                                                                       | 20       |
| Supplementary Figure 14. Arrhenius plots of NO conversions over Mo <sub>1</sub> /Fe <sub>2</sub> O <sub>3</sub> with different Mo loadings .....                                                                                               | 21       |
| Supplementary Figure 15. $X_{NO}$ as a function of temperature over Mo <sub>1</sub> /Fe <sub>2</sub> O <sub>3</sub> and 3.3% Mo/Fe <sub>2</sub> O <sub>3</sub> .....                                                                           | 22       |
| Supplementary Figure 16. SXRD patterns of Fe <sub>2</sub> (MoO <sub>4</sub> ) <sub>3</sub> , 3.3% Mo/Fe <sub>2</sub> O <sub>3</sub> , and $\alpha$ -Fe <sub>2</sub> O <sub>3</sub> .....                                                       | 23       |
| Supplementary Figure 17. TOFs in SCR at 270 °C over Mo <sub>1</sub> /Fe <sub>2</sub> O <sub>3</sub> with different Mo loadings ..                                                                                                              | 24       |
| Supplementary Figure 18. XRD patterns of W <sub>1</sub> /Fe <sub>2</sub> O <sub>3</sub> , $\alpha$ -Fe <sub>2</sub> O <sub>3</sub> , and $\gamma$ -WO <sub>3</sub> .....                                                                       | 25       |

---

|                                                                                                                                            |           |
|--------------------------------------------------------------------------------------------------------------------------------------------|-----------|
| Supplementary Figure 19. AC-STEM image of $W_1/Fe_2O_3$ .....                                                                              | 26        |
| Supplementary Figure 20. $H_2$ -TPR profiles of $W_1/Fe_2O_3$ , $Fe_1/WO_3$ , $\alpha-Fe_2O_3$ and $\gamma-WO_3$ .. .....                  | 27        |
| Supplementary Figure 21. $X_{NO}$ as a function of temperature over $W_1/Fe_2O_3$ with the different W loadings and $\alpha-Fe_2O_3$ ..... | 28        |
| Supplementary Figure 22. Arrhenius plots of NO conversions over $W_1/Fe_2O_3$ with different W loadings .....                              | 29        |
| Supplementary Figure 23. $X_{NO}$ as a function of temperature over $Mo_1/Fe_2O_3$ , $W_1/Fe_2O_3$ , and $Fe_1/WO_3$ .....                 | 30        |
| Supplementary Figure 24. TOFs over $Mo_1/Fe_2O_3$ , $W_1/Fe_2O_3$ , and $Fe_1/WO_3$ at 270 °C.....                                         | 31        |
| Supplementary Figure 25. TEM images, structure model and EDX mappings of $Fe_1/WO_3$ .....                                                 | 32        |
| Supplementary Figure 26. $X_{NO}$ as a function of temperature over $Fe_1/WO_3$ with the different Fe loadings and $\gamma-WO_3$ .....     | 33        |
| Supplementary Figure 27. The deconvoluted $H_2$ -TPR profiles of $Mo_1/Fe_2O_3$ and $\alpha-Fe_2O_3$ .....                                 | 34        |
| <b>Supplementary References</b> .....                                                                                                      | <b>35</b> |

## Supplementary Discussion

*The structure of  $\alpha$ -Fe<sub>2</sub>O<sub>3</sub> nanosheet.* The SXRD pattern of the  $\alpha$ -Fe<sub>2</sub>O<sub>3</sub> nanosheet in Supplementary Figure 1 is indexed to rhombohedral Fe<sub>2</sub>O<sub>3</sub> (JCPDS 33-0664) with  $a = b = 5.036 \text{ \AA}$  and  $c = 13.749 \text{ \AA}$ . According to the TEM/HRTEM images (Supplementary Figure 2), the synthesized  $\alpha$ -Fe<sub>2</sub>O<sub>3</sub> has a hexagonal nanosheet-shaped morphology with average sizes of 90 nm in width and 9 nm in thickness. In Supplementary Figure 2C, two series of fringes with an intersection angle of 60° are ascribed to (-120) and (110) planes, respectively, from which the basal up surfaces of the horizontally-lying nanosheets are deduced to be  $\alpha$ -Fe<sub>2</sub>O<sub>3</sub>(001) surface. Thus, the proportion of exposed (001) surfaces is calculated to be ~90% as follows:  $2 \times (90 + 180) \times 45\sqrt{3} / [2 \times (90 + 180) \times 45\sqrt{3} + 6 \times 90 \times 9] = 90\%$ .

*Calculation on the number of the anchoring sites.* For  $\alpha$ -Fe<sub>2</sub>O<sub>3</sub>, the number of anchoring sites on (001) surfaces is calculated as follows:

(i) *Average density of the unit cell of the Fe<sub>2</sub>O<sub>3</sub>.* For the perfect Fe<sub>2</sub>O<sub>3</sub> crystal, the unit cell can be expressed as a formula Fe<sub>12</sub>O<sub>18</sub>, and thus the mass ( $M_{\text{cell}}$ ) of one unit cell is calculated to be  $1.6 \times 10^{-21} \text{ g}$ . The volume ( $V_{\text{cell}}$ ) of one unit cell according to the lattice parameters ( $a = b = 0.503 \text{ nm}$ ,  $c = 1.374 \text{ nm}$ ) and the hexagonal structure feature of the Fe<sub>2</sub>O<sub>3</sub> (the SXRD pattern of the Fe<sub>2</sub>O<sub>3</sub> in Supplementary Figure 1) can be calculated:

$$V_{\text{cell}} = \sqrt{3}/2 \times a^2 \times c = \sqrt{3}/2 \times (0.503 \text{ nm})^2 \times 1.374 \text{ nm} = 0.301 \text{ nm}^3$$

Thus, an average density ( $\rho$ ) of the unit cell is calculated:

$$\rho = M_{\text{cell}} / V_{\text{cell}} = 5.316 \times 10^{-21} \text{ g nm}^{-3}.$$

(ii) *The number of the nanosheets for 1 g Fe<sub>2</sub>O<sub>3</sub> nanosheets.* The volume ( $V_{\text{sheet}}$ ) and mass ( $M_{\text{sheet}}$ ) of single Fe<sub>2</sub>O<sub>3</sub> nanosheet are calculated according to the TEM/HRTEM images and a corresponding model (Supplementary Figure 2) as follows:

$$V_{\text{sheet}} = 3\sqrt{3}/2 \times l^2 \times h = 3\sqrt{3}/2 \times (90 \text{ nm})^2 \times 9 \text{ nm} = 1.90 \times 10^5 \text{ nm}^3,$$

$$M_{\text{sheet}} = V_{\text{sheet}} \times \rho = 1.90 \times 10^5 \text{ nm}^3 \times 5.316 \times 10^{-21} \text{ g/nm}^3 = 1.01 \times 10^{-15} \text{ g},$$

where  $l$  and  $h$  represent the average length and height of the Fe<sub>2</sub>O<sub>3</sub> nanosheets, respectively (Supplementary Figure 2). Therefore, the number ( $N_{\text{sheet}}$ ) of the Fe<sub>2</sub>O<sub>3</sub> nanosheets that 1 g catalyst ( $M_{\text{cat}}$ ) contains:

$$N_{\text{sheet}} = M_{\text{cat}} / M_{\text{sheet}} = 1 \text{ g} \div (1.01 \times 10^{-15} \text{ g}) = 9.90 \times 10^{14}.$$

(iii) *The number of the anchoring sites on the (001) surfaces of 1 g Fe<sub>2</sub>O<sub>3</sub>.* According to the model in Supplementary Figure 2D, the areas of the single anchoring site ( $S_a$ ) and the (001) surface of 1 g Fe<sub>2</sub>O<sub>3</sub> ( $S_{001}$ ) can be respectively calculated as:

$$S_a = \sqrt{3}/2 \times a^2 = 0.219 \text{ nm}^2,$$

$$S_{001} = 2 \times 3\sqrt{3}/2 \times l^2 \times N_{\text{sheet}} = 2 \times 3\sqrt{3}/2 \times (90 \text{ nm})^2 \times 9.90 \times 10^{14} = 4.17 \times 10^{19} \text{ nm}^2.$$

---

Therefore, the number of the anchoring sites ( $N_a$ ) can be calculated as follows:

$$N_a = S_{001} / S_a = 4.17 \times 10^{19} \text{ nm}^2 / 0.219 \text{ nm}^2 = 1.9 \times 10^{20}.$$

Based on the above discussion, if all the anchoring sites are occupied by Mo or W ions, the Mo or W loading in weight with respect to  $\text{Fe}_2\text{O}_3$  is  $\sim 3.0$  wt% or  $\sim 5.8$  wt%, respectively, according to the following calculations:

$$\begin{aligned} \text{Mo wt\%} &= (N_a/N_A) \text{ mol} \times M_{\text{Mo}} \text{ g mol}^{-1} / (1 \text{ g}) = (1.9 \times 10^{20} / (6.02 \times 10^{23})) \text{ mol} \times 95.94 \text{ g mol}^{-1} / (1 \text{ g}) \\ &= 3.0 \text{ wt\%}; \end{aligned}$$

$$\begin{aligned} \text{W wt\%} &= (N_a/N_A) \text{ mol} \times M_{\text{W}} \text{ g mol}^{-1} / (1 \text{ g}) = (1.9 \times 10^{20} / (6.02 \times 10^{23})) \text{ mol} \times 183.8 \text{ g mol}^{-1} / (1 \text{ g}) \\ &= 5.8 \text{ wt\%}; \end{aligned}$$

The number of anchoring sites and the loading of Fe on the  $\gamma$ - $\text{WO}_3$  nanosheets can also be calculated by the same method according to the structures of  $\gamma$ - $\text{WO}_3$  and the dinuclear sites (Supplementary Figures 17 and 22). If all the anchoring sites are occupied by Fe ions, the Fe loading in weight with respect to  $\gamma$ - $\text{WO}_3$  is  $\sim 0.42\%$ .

*Analysis of the STEM image.* In AC-STEM, the intensity contributed by an atom is approximately proportional to  $Z^n$  (where  $Z$  is the atomic number,  $1.6 < n < 1.9$ )<sup>1</sup>, and thus the intensity is greater for heavier atoms. The brighter points in Figure 1a were identified as Mo atoms and the intensity ratio of the Mo atom to Fe atom is theoretically in a range 2.1-2.5 [ $(Z_{\text{Mo}}/Z_{\text{Fe}})^n = (42/26)^n$ ,  $1.6 < n < 1.9$ ]. Then, we calculated the intensity ratio of the brighter dots to the darker ones according to the AC-STEM image in Figure 1 and Supplementary Figure 3. Considering that the number of atoms in a column can also have an effect on the intensity<sup>2</sup>, the background intensity was subtracted. Therefore, the experimental intensity ratio is  $\sim 2.3$  [(210-50)/(120-50) =  $\sim 2.3$ ], in the theoretical intensity ratio range 2.1-2.5. This result indicates that the brighter points in Figure 1a are Mo atoms and the lighter gray points are Fe atoms.

*H<sub>2</sub>-TPR.* The reduction of  $\alpha$ - $\text{Fe}_2\text{O}_3$  starts at  $\sim 190$  °C, and a weak reduction peak at  $\sim 267$  °C can be ascribed to the surface active oxygen species, merely accounting for 2% of the total oxygen species of  $\alpha$ - $\text{Fe}_2\text{O}_3$ . According to the calculated area ratios of the sub-bands at relatively low (I), medium (II) and high (III) temperatures, which was 7.8 : 22.2 : 70.0 (Supplementary Table 2 and Supplementary Figure 27), i.e., 0.7 : 2 : 6, Fe species in  $\alpha$ - $\text{Fe}_2\text{O}_3$  mainly followed a three-step reduction process:  $\text{Fe}_2\text{O}_3 \rightarrow \text{Fe}_3\text{O}_4 \rightarrow \text{FeO} \rightarrow \text{Fe}$ . During the whole process, the  $\text{H}_2$  consumption ratio of the three steps should be 1 : 2 : 6. Note that the  $\text{H}_2$  consumption ratio at the low temperature (I) was smaller than the theoretical value of the first reduction step ( $\text{Fe}_2\text{O}_3 \rightarrow \text{Fe}_3\text{O}_4$ ), indicating the existence of the surface defect oxygen. According to the  $\text{H}_2$  consumption ratio at the low temperature (I), an actual formula of  $\alpha$ - $\text{Fe}_2\text{O}_3$  nanosheet should be  $\text{Fe}_2\text{O}_{2.9}$ .

For  $\text{Mo}_1/\text{Fe}_2\text{O}_3$ , there was also a weak reduction peak at  $\sim 267$  °C, which accounts for 2% of the total oxygen species of  $\text{Mo}_1/\text{Fe}_2\text{O}_3$ . This result indicated that the Mo anchoring has little effect on the redox

---

ability of the surface active O atoms of  $\text{Mo}_1/\text{Fe}_2\text{O}_3$ . However, the reduction temperatures of the bulk O atoms shifted up by  $\sim 20$  °C. We further calculated  $\text{H}_2$  consumption area ratios of I : II : III, which are also 0.7 : 2 : 6, suggesting that the three-step reduction mechanism was not influenced by the Mo loading. Furthermore, an extra weak peak appears in the high temperature regime 460-615 °C, which accounts for 1.8% of the total oxygen species of  $\text{Mo}_1/\text{Fe}_2\text{O}_3$ . We calculated the ratio of the consumed hydrogen atoms of this peak to Mo atoms (H/Mo) to be  $\sim 5$ , confirming the reduction process of  $\text{Mo}^{5+} \rightarrow \text{Mo}^0$ .

---

## Supplementary Tables

**Supplementary Table 1.** EXAFS analysis results of the samples.

| Sample                                                       | Shell | CN <sup>a</sup> | R <sup>b</sup> (Å) | $\sigma^2$ <sup>c</sup> (Å <sup>2</sup> ) | $\Delta E_0$ <sup>d</sup> |
|--------------------------------------------------------------|-------|-----------------|--------------------|-------------------------------------------|---------------------------|
| Mo <sub>1</sub> /Fe <sub>2</sub> O <sub>3</sub> <sup>e</sup> | Mo-O  | 6               | 1.88(7)            | 0.008(4)                                  | -5.4                      |
|                                                              | Mo-Fe | 1               | 2.86(4)            | 0.005(4)                                  | -3.4                      |
|                                                              | Mo-Fe | 3               | 2.93(7)            | 0.039(5)                                  | +0.4                      |
| Fe <sub>2</sub> O <sub>3</sub> <sup>f</sup>                  | Fe-O  | 6               | 1.98(1)            | 0.010(3)                                  | -5.1                      |
|                                                              | Fe-Fe | 4               | 3.02(1)            | 0.010(6)                                  | +3.1                      |
|                                                              | Fe-Fe | 3               | 3.36(0)            | 0.001(3)                                  | +4.9                      |

<sup>a</sup>CN, coordination number;

<sup>b</sup>R, distance between absorber and backscatter atoms;

<sup>c</sup> $\sigma^2$ , Debye-Waller factor;

<sup>d</sup> $\Delta E_0$ , energy shift;

<sup>e</sup>R-space fit,  $\Delta k = 2.3\text{--}11.4 \text{ \AA}^{-1}$ ,  $\Delta r = 0.8\text{--}3.2 \text{ \AA}$ ;

<sup>f</sup>R-space fit,  $\Delta k = 2.5\text{--}9.0 \text{ \AA}^{-1}$ ,  $\Delta r = 0.4\text{--}4.1 \text{ \AA}$ ;

**Supplementary Table 2.** The calculated area ratio of sub-bands derived from the deconvoluted H<sub>2</sub>-TPR profiles of  $\alpha$ -Fe<sub>2</sub>O<sub>3</sub> and Mo<sub>1</sub>/Fe<sub>2</sub>O<sub>3</sub>.

| Sample                                          | Area ratio I (%)                         | Area ratio II (%)        | Area ratio III (%)                                                | Area ratio IV (%)       |
|-------------------------------------------------|------------------------------------------|--------------------------|-------------------------------------------------------------------|-------------------------|
| Fe <sub>2</sub> O <sub>3</sub>                  | I <sub>267</sub> +I <sub>300</sub> = 7.8 | II <sub>340</sub> = 22.2 | III <sub>368</sub> +III <sub>400</sub> +III <sub>426</sub> = 70.0 | -                       |
| Mo <sub>1</sub> /Fe <sub>2</sub> O <sub>3</sub> | I <sub>267</sub> +I <sub>321</sub> = 7.9 | II <sub>366</sub> = 22.8 | III <sub>404</sub> +III <sub>439</sub> = 67.5                     | IV <sub>532</sub> = 1.8 |



## Supplementary Figures

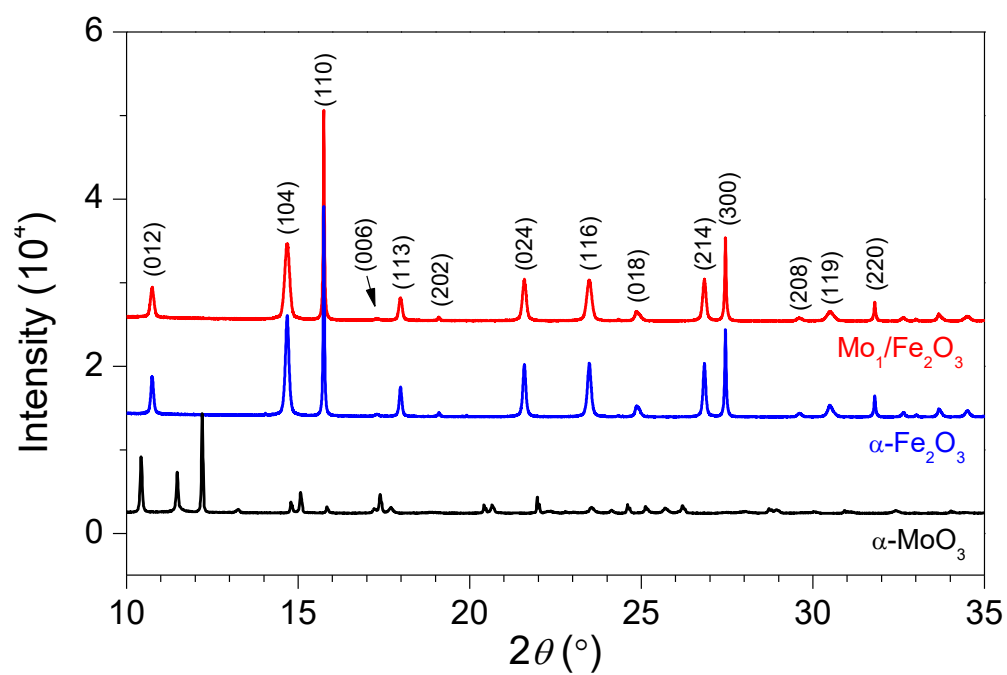

**Supplementary Figure 1.** SXRD patterns of  $\text{Mo}_1/\text{Fe}_2\text{O}_3$  (red line),  $\alpha\text{-Fe}_2\text{O}_3$  (blue line), and  $\alpha\text{-MoO}_3$  (black line).

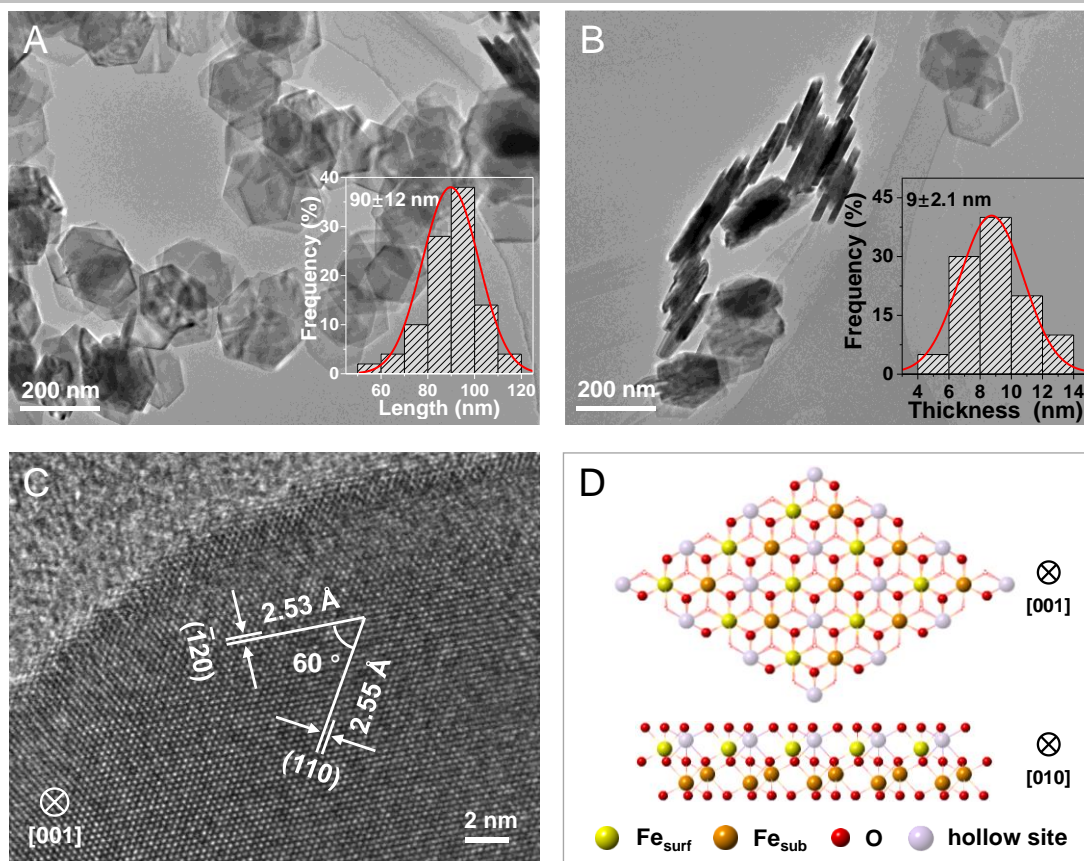

**Supplementary Figure 2.** (A,B) TEM and (C) HRTEM images of  $\alpha$ -Fe<sub>2</sub>O<sub>3</sub> nanosheets. Insets in panels **A** and **B** are the side length and thickness distributions of the  $\alpha$ -Fe<sub>2</sub>O<sub>3</sub> nanosheets, respectively. (D) Structural model of  $\alpha$ -Fe<sub>2</sub>O<sub>3</sub> nanosheets. The yellow, brown, red, and translucent balls represent surface Fe atoms, subsurface Fe atoms, O atoms, and three-fold hollow sites, respectively.

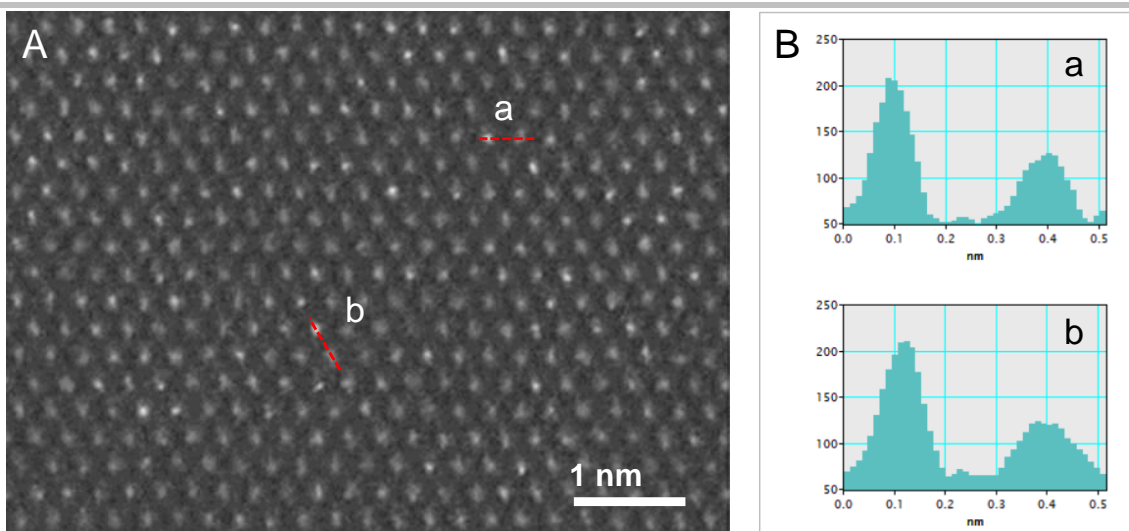

**Supplementary Figure 3.** (A) AC-STEM image of  $\text{MoO}_1/\text{Fe}_2\text{O}_3$ . (B) The image intensities of the dinuclear sites in directions a and b shown in A.

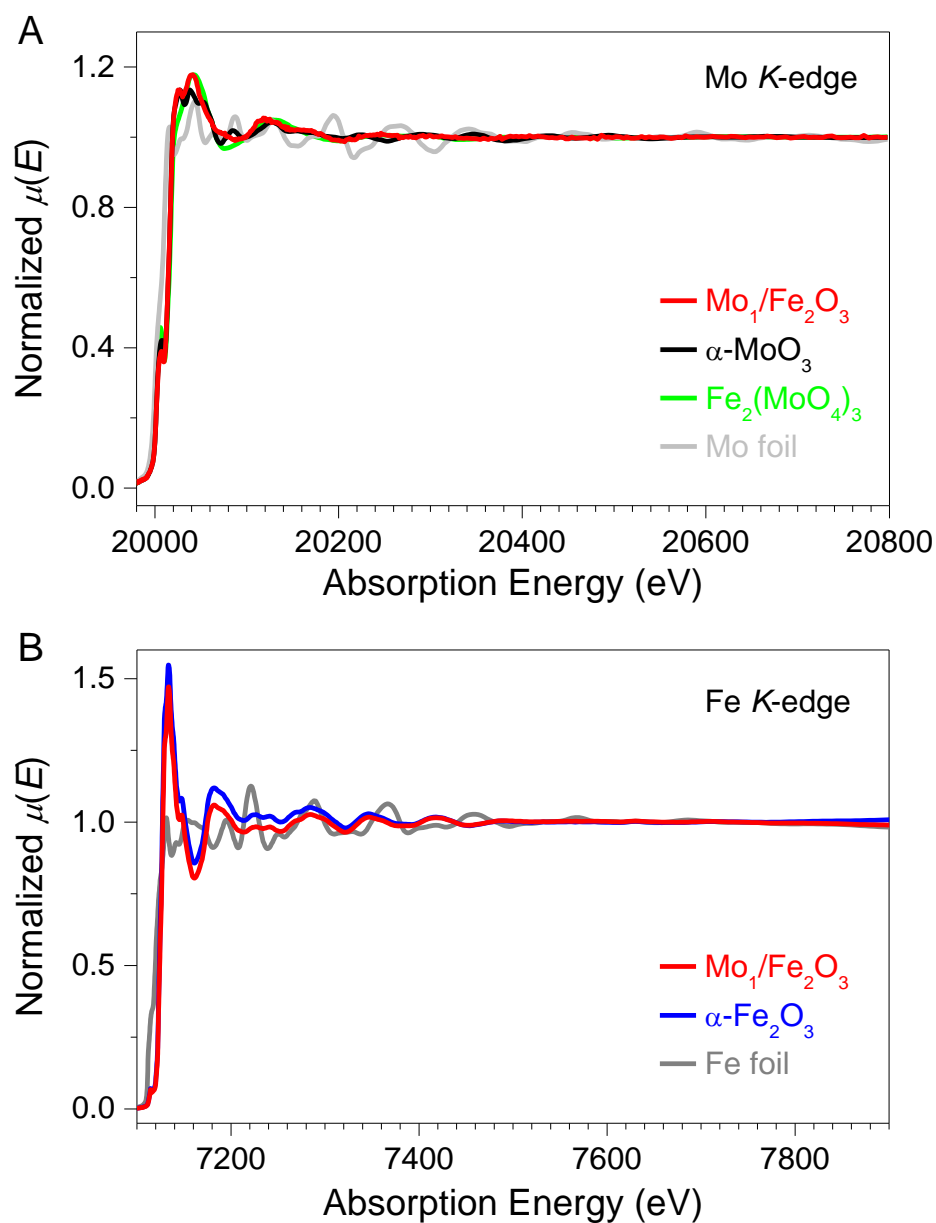

**Supplementary Figure 4.** (A) X-ray absorption spectra of  $\text{Mo}_1/\text{Fe}_2\text{O}_3$  (red line),  $\alpha\text{-MoO}_3$  (black line),  $\text{Fe}_2(\text{MoO}_4)_3$  (green line), and Mo foil (gray line) at the Mo K-edge. (B) X-ray absorption spectra of  $\text{Mo}_1/\text{Fe}_2\text{O}_3$  (red line),  $\alpha\text{-Fe}_2\text{O}_3$  (blue line), and Fe foil (gray line) at the Fe K-edge.

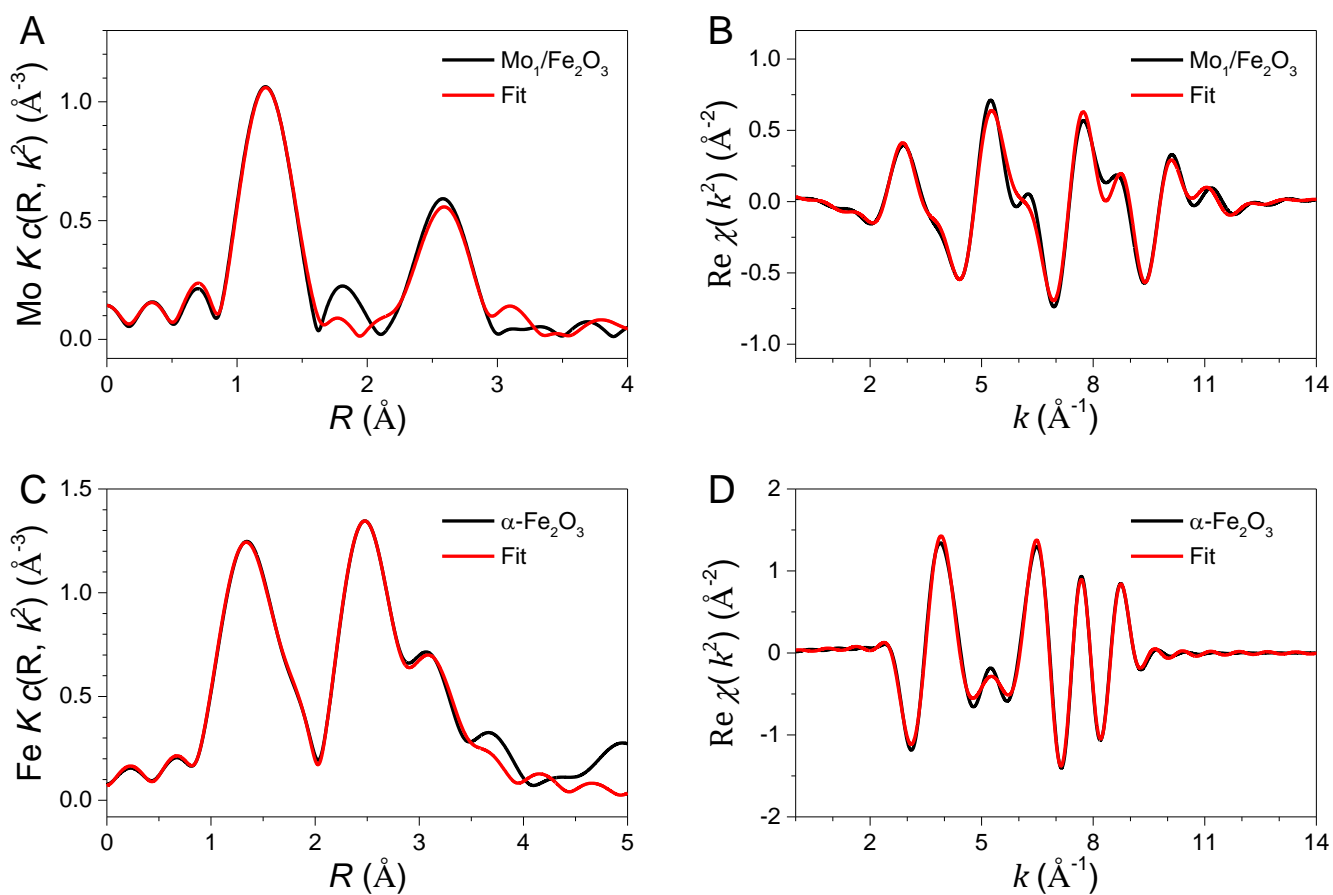

**Supplementary Figure 5.** (A,B)  $R$ -space ( $\Delta k = 2.3\text{-}11.4 \text{ \AA}^{-1}$ ) and inverse FT spectra ( $\Delta r = 0.8\text{-}3.2 \text{ \AA}$ ) at the Mo  $K$ -edge of  $\text{Mo}_1/\text{Fe}_2\text{O}_3$ . (C,D)  $R$ -space ( $\Delta k = 2.5\text{-}9.0 \text{ \AA}^{-1}$ ) and inverse FT spectra ( $\Delta r = 0.4\text{-}4.1 \text{ \AA}$ ) at the Fe  $K$ -edge of  $\alpha\text{-Fe}_2\text{O}_3$ .

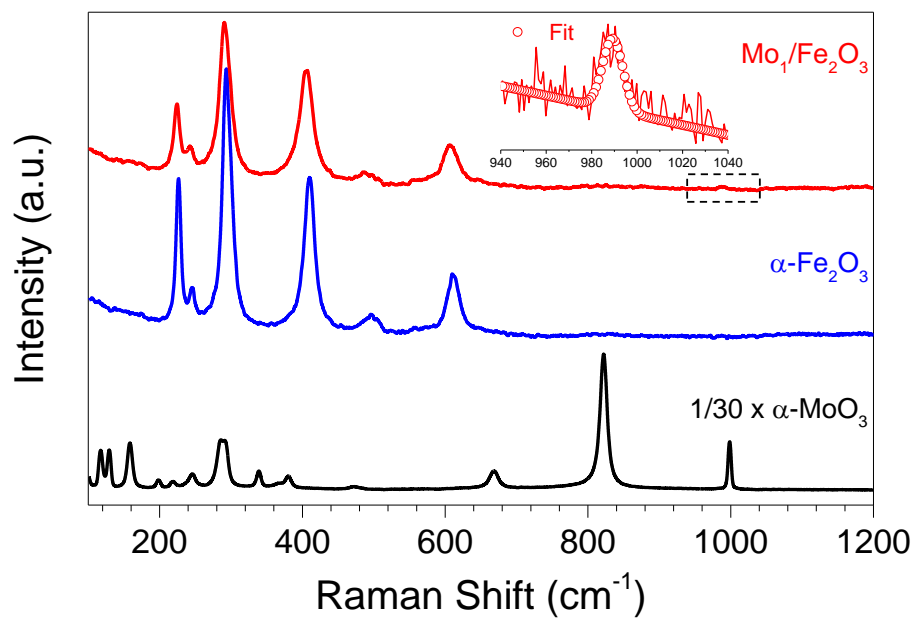

**Supplementary Figure 6.** Raman spectra of Mo<sub>1</sub>/Fe<sub>2</sub>O<sub>3</sub> (red line), α-Fe<sub>2</sub>O<sub>3</sub> (blue line), and α-MoO<sub>3</sub> (black line). Inset: a double-bond-specific Raman band at ~989 cm<sup>-1</sup> is ascribed to the Mo=O bond.

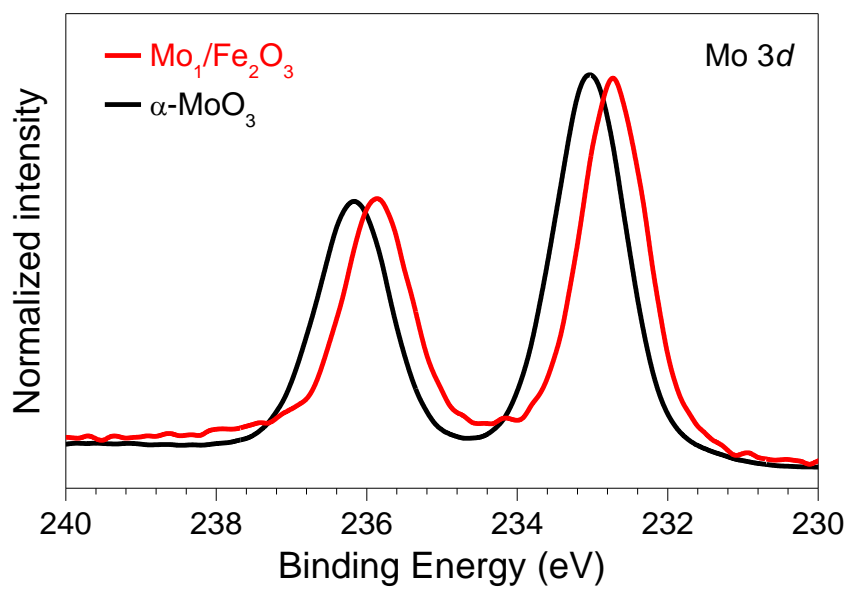

**Supplementary Figure 7.** X-ray photoelectron spectra of Mo 3d over  $\text{Mo}_1/\text{Fe}_2\text{O}_3$  (red line) and  $\alpha\text{-MoO}_3$  (black line).

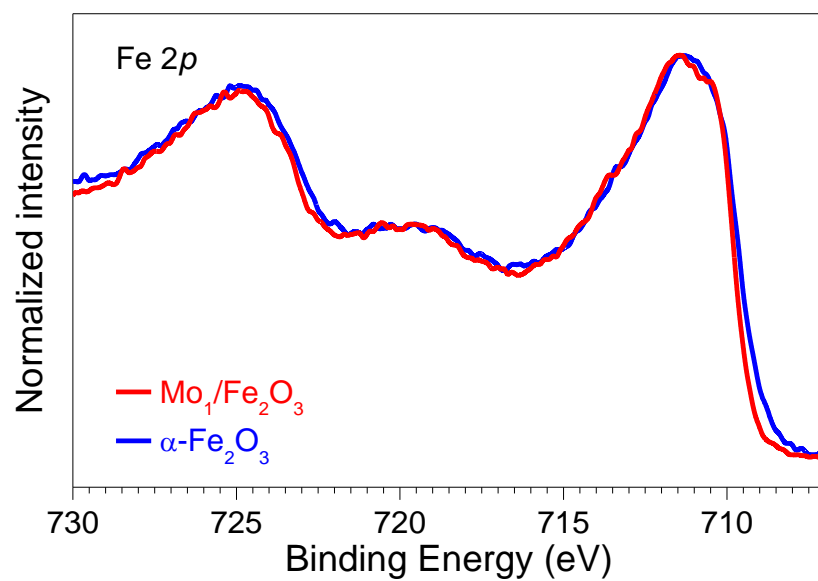

**Supplementary Figure 8.** X-ray photoelectron spectra of Fe 2p over  $\text{Mo}_1/\text{Fe}_2\text{O}_3$  (red line) and  $\alpha\text{-Fe}_2\text{O}_3$  (blue line).



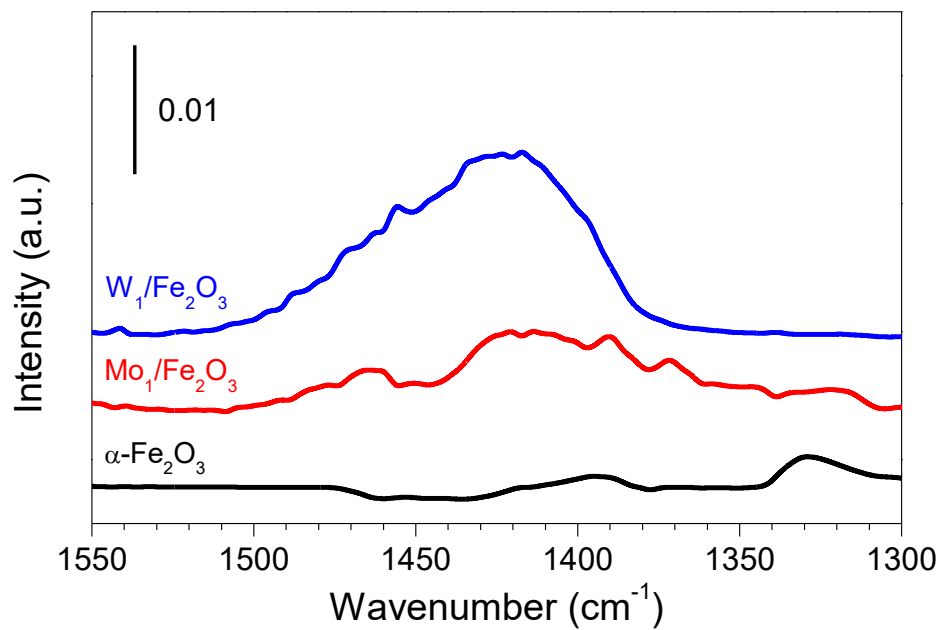

**Supplementary Figure 9.** DRIFT spectra of NH<sub>3</sub> adsorption on W<sub>1</sub>/Fe<sub>2</sub>O<sub>3</sub> (blue line), Mo<sub>1</sub>/Fe<sub>2</sub>O<sub>3</sub> (red line) and α-Fe<sub>2</sub>O<sub>3</sub> (black line) at 50 °C.

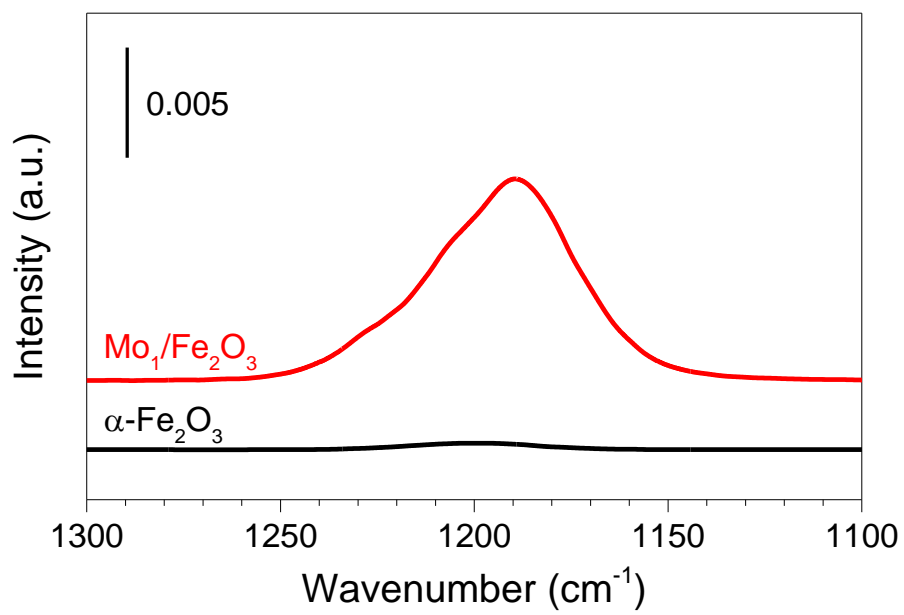

**Supplementary Figure 10.** DRIFT spectra of NH<sub>3</sub> adsorption on Mo<sub>1</sub>/Fe<sub>2</sub>O<sub>3</sub> (red line) and α-Fe<sub>2</sub>O<sub>3</sub> (black line) at 250 °C.

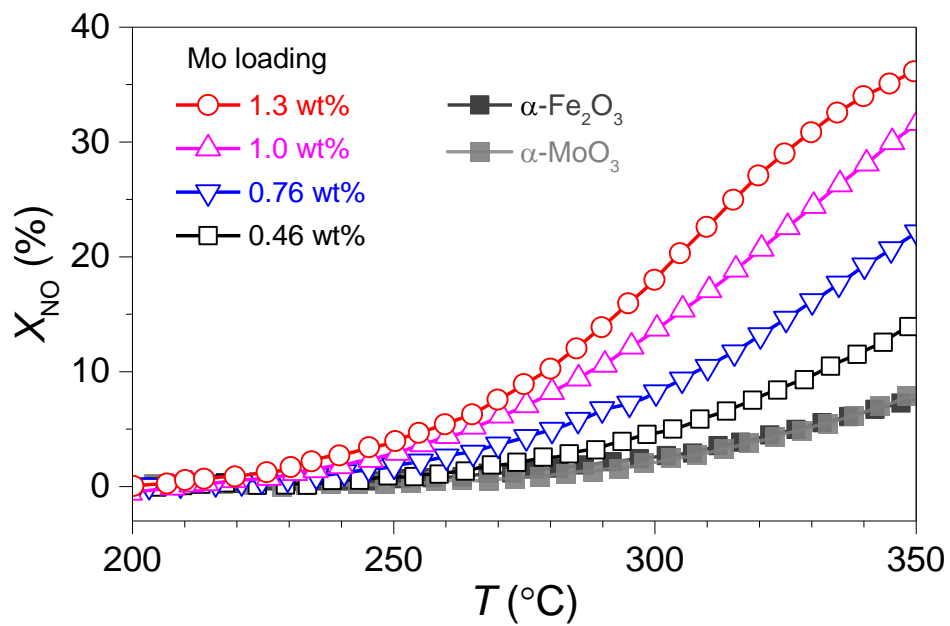

**Supplementary Figure 11.**  $X_{NO}$  as a function of temperature ( $T$ ) over  $Mo_1/Fe_2O_3$  with the different Mo loadings together with  $\alpha$ - $Fe_2O_3$  and  $\alpha$ - $MoO_3$ . Reaction conditions: 500 ppm NO, 500 ppm  $NH_3$ , 3 vol%  $O_2$ , balance  $N_2$ , and GHSV 800,000  $h^{-1}$ .

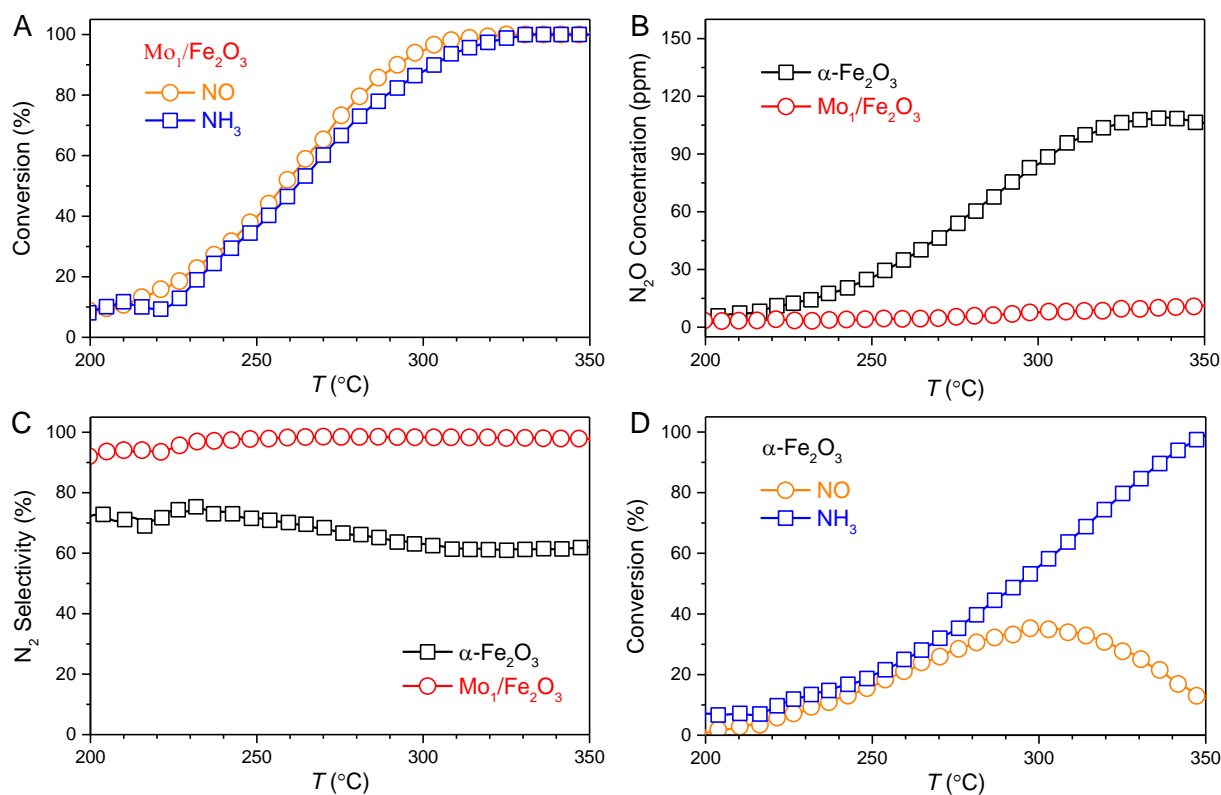

**Supplementary Figure 12.** SCR performance as a function of temperature ( $T$ ): **(A)** NO (orange circle) and NH<sub>3</sub> (blue square) conversion over Mo<sub>1</sub>/Fe<sub>2</sub>O<sub>3</sub>. **(B)** N<sub>2</sub>O concentration over α-Fe<sub>2</sub>O<sub>3</sub> (black square) and Mo<sub>1</sub>/Fe<sub>2</sub>O<sub>3</sub> (red circle). **(C)** N<sub>2</sub> selectivity over α-Fe<sub>2</sub>O<sub>3</sub> (black square) and Mo<sub>1</sub>/Fe<sub>2</sub>O<sub>3</sub> (red circle). **(D)** NO (orange circle) and NH<sub>3</sub> (blue square) conversion over α-Fe<sub>2</sub>O<sub>3</sub>. Reaction conditions: 500 ppm NO, 500 ppm NH<sub>3</sub>, 3 vol% O<sub>2</sub>, balance N<sub>2</sub>, and GHSV 66,000 h<sup>-1</sup>.

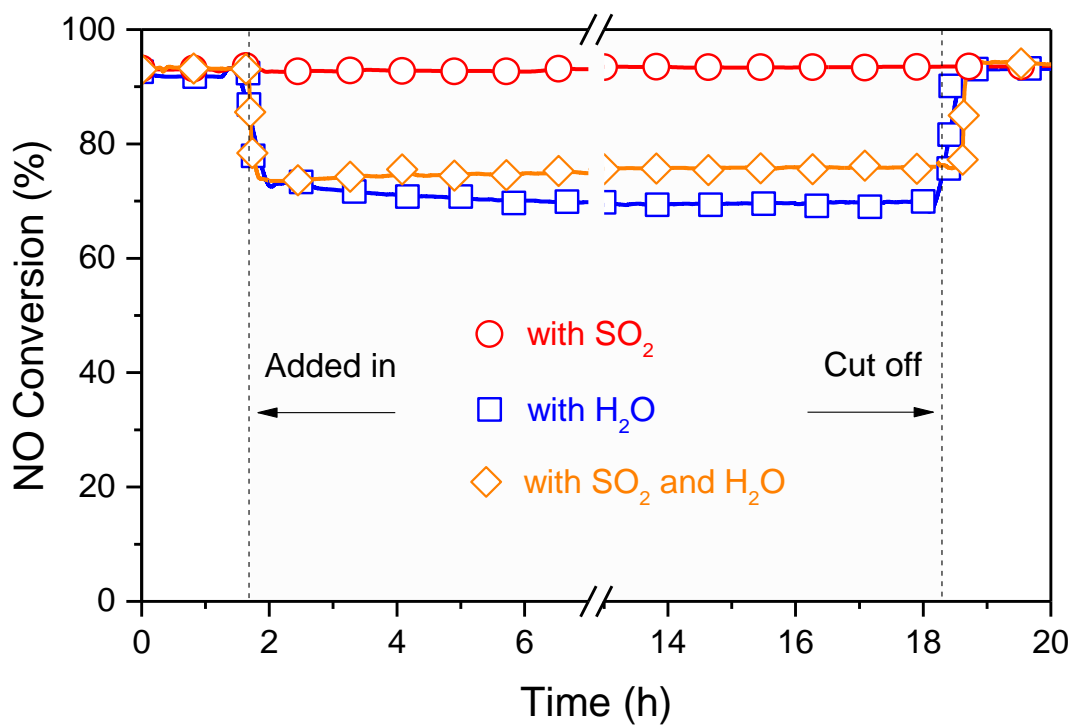

**Supplementary Figure 13.** Effect of H<sub>2</sub>O and SO<sub>2</sub> on catalytic activity over Mo<sub>01</sub>/Fe<sub>2</sub>O<sub>3</sub> at 300 °C. Reaction conditions: 500 ppm NO, 500 ppm NH<sub>3</sub>, 3 vol% O<sub>2</sub>, 200 ppm SO<sub>2</sub> (when used), 5 vol% H<sub>2</sub>O (when used), balance N<sub>2</sub>, and GHSV 66,000 h<sup>-1</sup>.

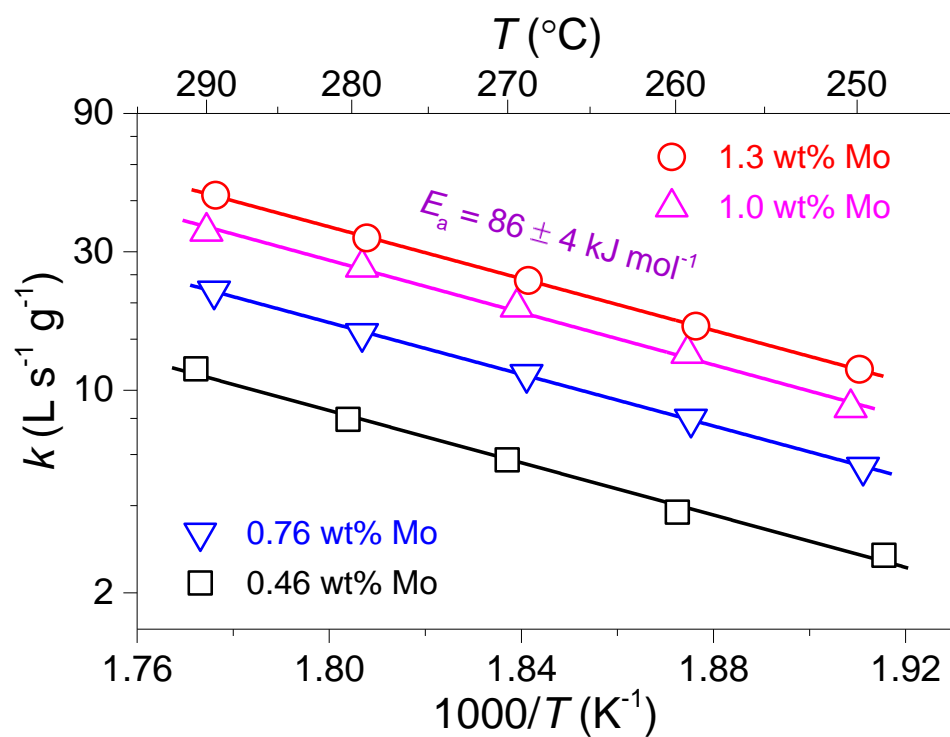

**Supplementary Figure 14.** Arrhenius plots of NO conversions in SCR over  $\text{Mo}_01/\text{Fe}_2\text{O}_3$  with different Mo loadings. Reaction conditions: 500 ppm NO, 500 ppm  $\text{NH}_3$ , 3 vol%  $\text{O}_2$ , balance  $\text{N}_2$ , and GHSV  $800,000 \text{ h}^{-1}$ .

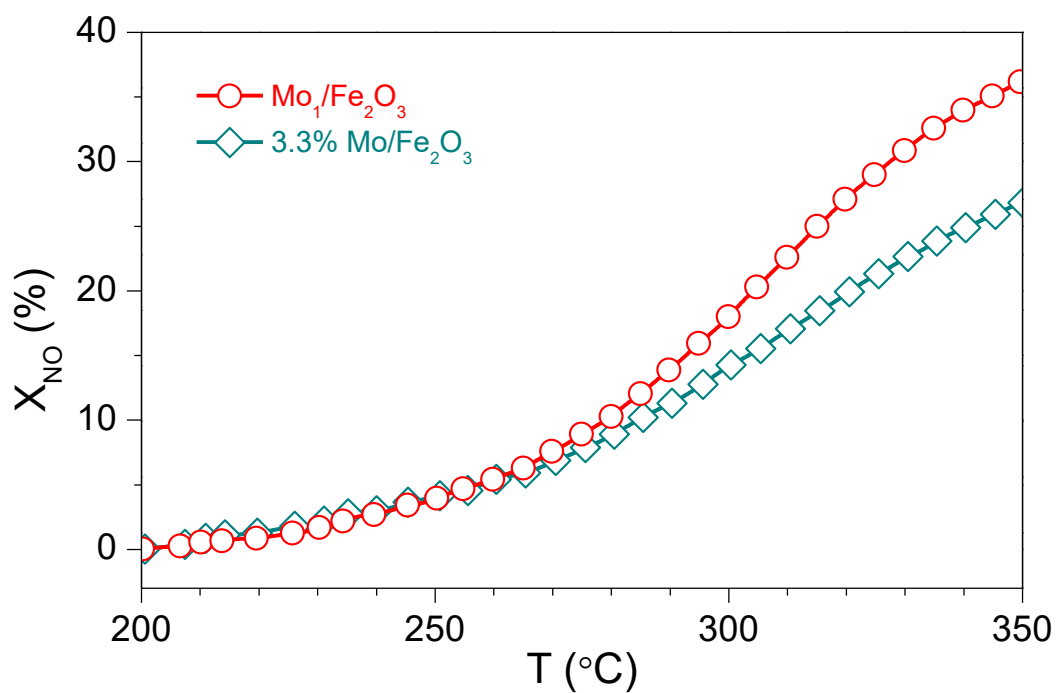

**Supplementary Figure 15.**  $X_{NO}$  as a function of temperature ( $T$ ) over  $Mo_1/Fe_2O_3$  (red circle) and 3.3%  $Mo/Fe_2O_3$  (cyan square). Reaction conditions: 500 ppm NO, 500 ppm  $NH_3$ , 3 vol%  $O_2$ , balance  $N_2$ , and GHSV 800,000  $h^{-1}$ .

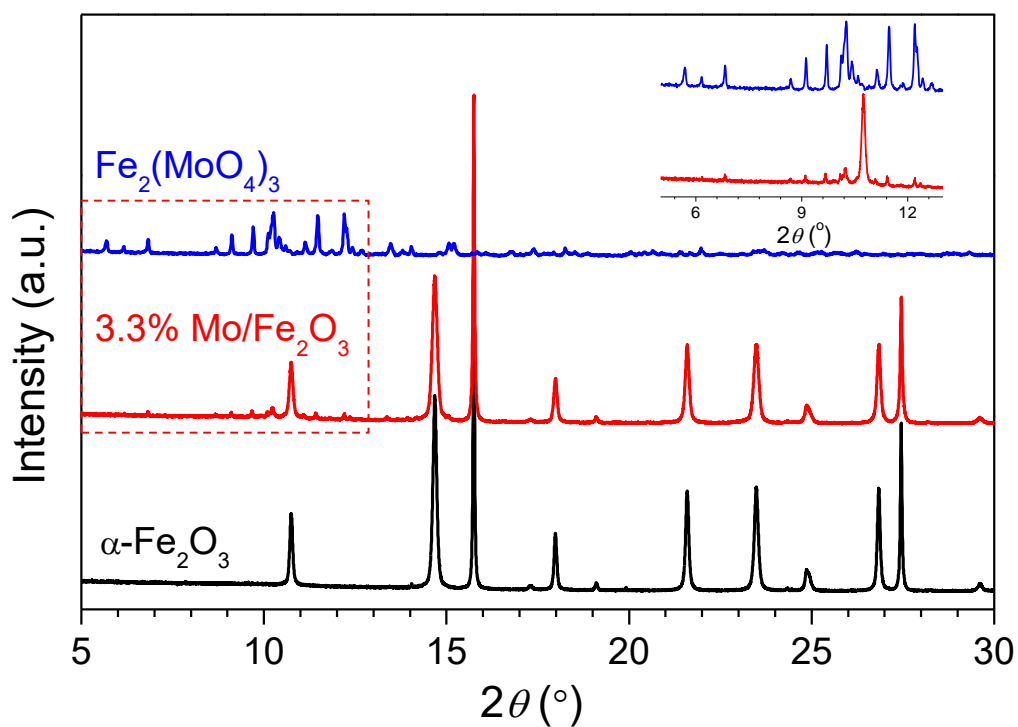

**Supplementary Figure 16.** SXRD patterns of  $\text{Fe}_2(\text{MoO}_4)_3$  (blue line), 3.3% Mo/ $\text{Fe}_2\text{O}_3$  (red line), and  $\alpha\text{-Fe}_2\text{O}_3$  (black line). Inset: the enlarged areas of the dashed rectangle showing diffraction due to the  $\text{Fe}_2(\text{MoO}_4)_3$  phase on the surfaces of 3.3% Mo/ $\text{Fe}_2\text{O}_3$



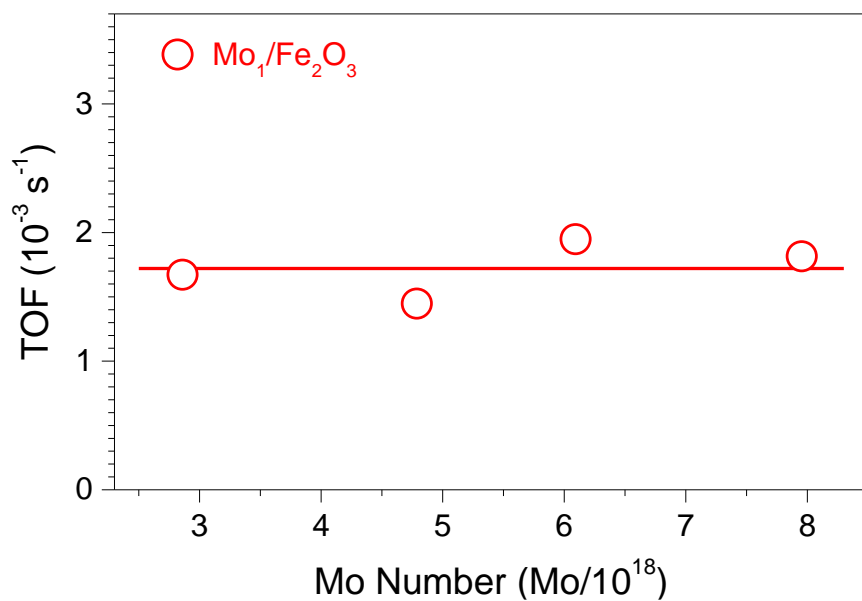

**Supplementary Figure 17.** TOFs in SCR at 270 °C over  $\text{Mo}_1/\text{Fe}_2\text{O}_3$  with the different Mo loadings. Reaction conditions: 500 ppm NO, 500 ppm  $\text{NH}_3$ , 3 vol%  $\text{O}_2$ , balance  $\text{N}_2$ , and GHSV  $800,000 \text{ h}^{-1}$ . The red line is to guide the eye.

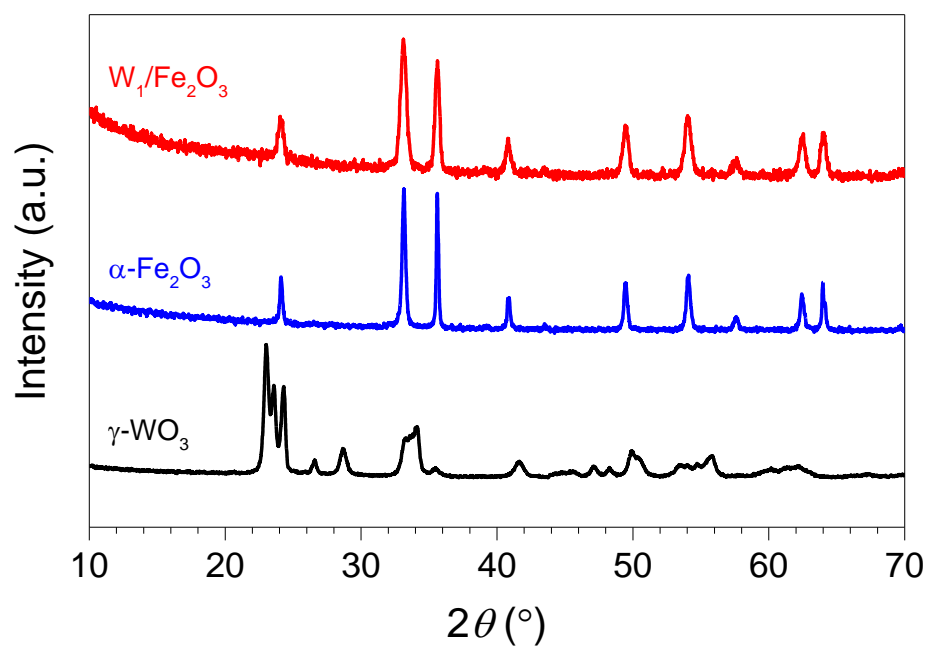

**Supplementary Figure 18.** XRD patterns of W<sub>1</sub>/Fe<sub>2</sub>O<sub>3</sub> (red line), α-Fe<sub>2</sub>O<sub>3</sub> (blue line), and γ-WO<sub>3</sub> (black line).

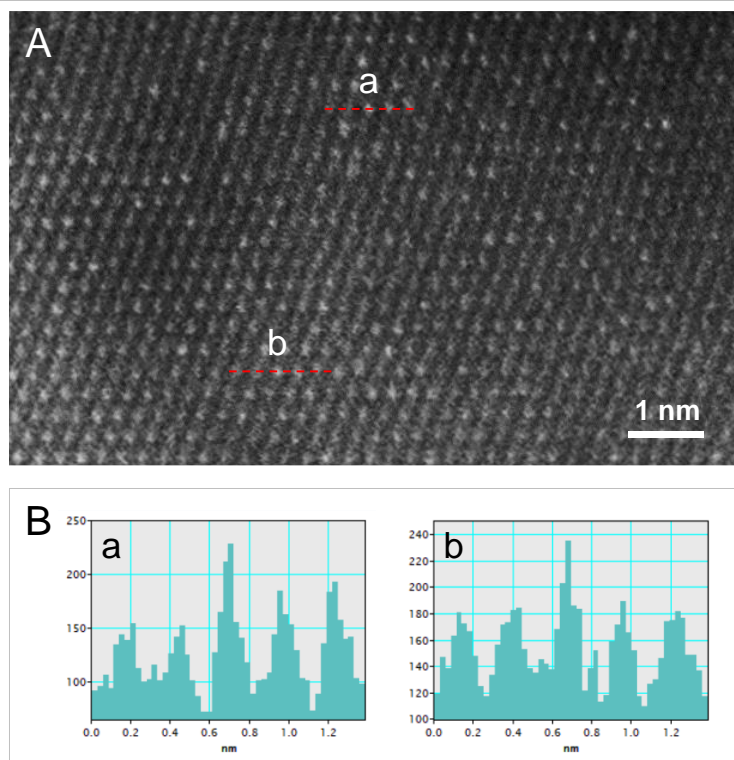

**Supplementary Figure 19.** (A) AC-STEM image of  $W_1/Fe_2O_3$ . (B) The image intensity line scans along the directions a and b shown in A.

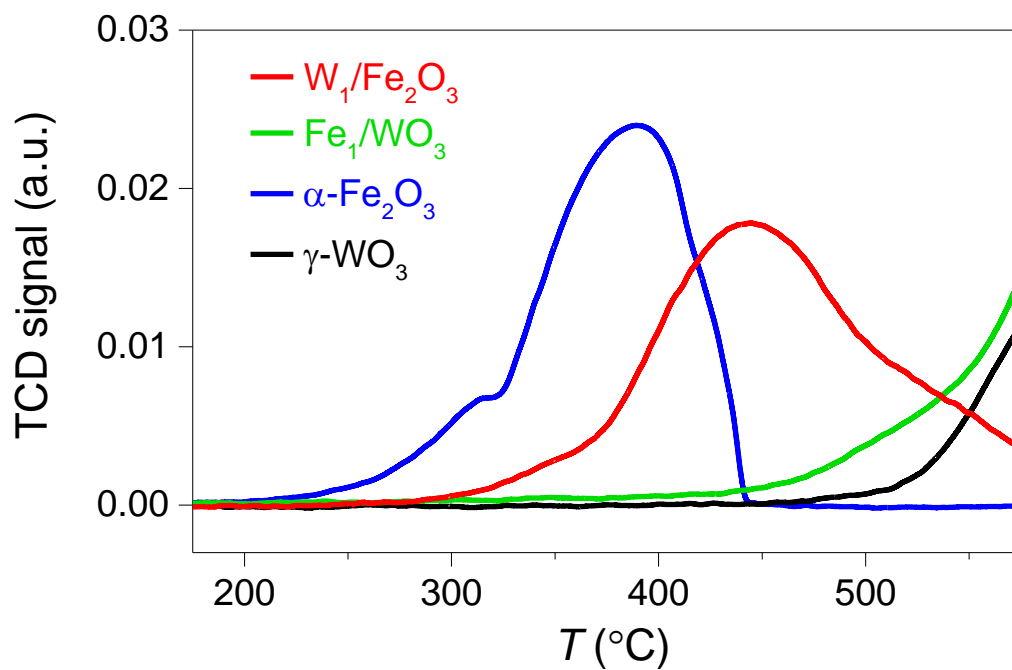

**Supplementary Figure 20.** H<sub>2</sub>-TPR profiles of W<sub>1</sub>/Fe<sub>2</sub>O<sub>3</sub> (red line), Fe<sub>1</sub>/WO<sub>3</sub> (green line),  $\alpha$ -Fe<sub>2</sub>O<sub>3</sub> (blue line) and  $\gamma$ -WO<sub>3</sub> (black line).

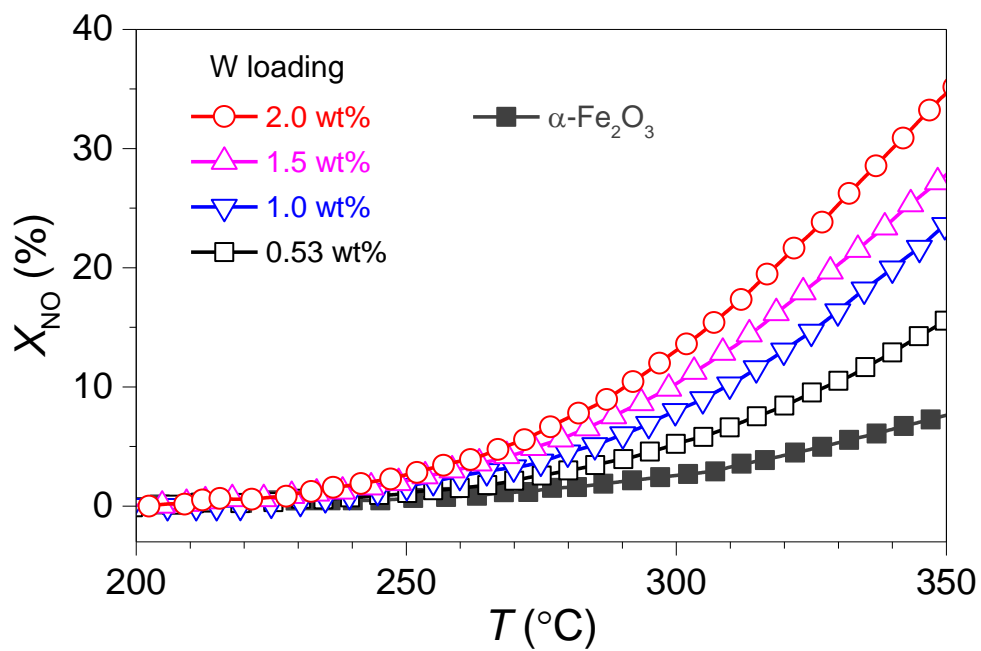

**Supplementary Figure 21.**  $X_{NO}$  as a function of temperature ( $T$ ) over  $W_1/Fe_2O_3$  with the different W loadings and  $\alpha\text{-Fe}_2O_3$ . Reaction conditions: 500 ppm NO, 500 ppm  $NH_3$ , 3 vol%  $O_2$ , balance  $N_2$ , and GHSV 800,000  $h^{-1}$ .

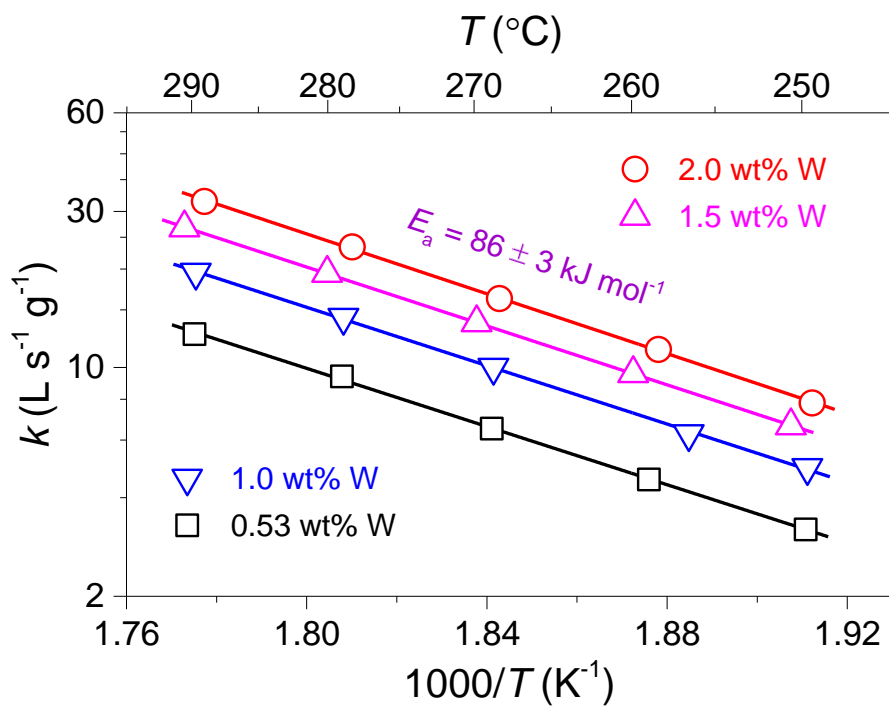

**Supplementary Figure 22.** Arrhenius plots of NO conversions in SCR over  $\text{W}_1/\text{Fe}_2\text{O}_3$  with different W loadings. Reaction conditions: 500 ppm NO, 500 ppm  $\text{NH}_3$ , 3 vol%  $\text{O}_2$ , balance  $\text{N}_2$ , and GHSV 800,000  $\text{h}^{-1}$ .

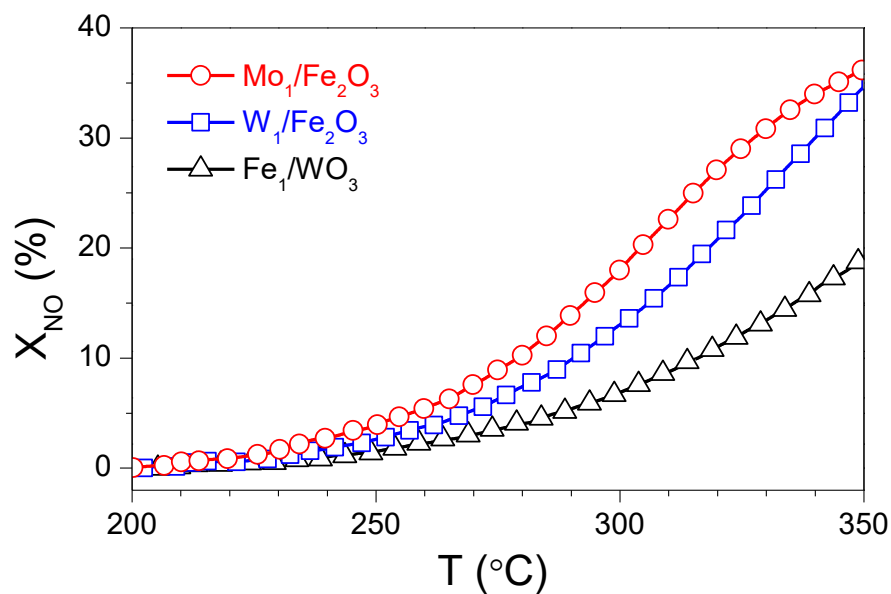

**Supplementary Figure 23.**  $X_{NO}$  as a function of temperature ( $T$ ) over Mo<sub>1</sub>/Fe<sub>2</sub>O<sub>3</sub> (red circle), W<sub>1</sub>/Fe<sub>2</sub>O<sub>3</sub> (blue square), and Fe<sub>1</sub>/WO<sub>3</sub> (black triangle). Reaction conditions: 500 ppm NO, 500 ppm NH<sub>3</sub>, 3 vol% O<sub>2</sub>, balance N<sub>2</sub>, and GHSV 800,000 h<sup>-1</sup>.

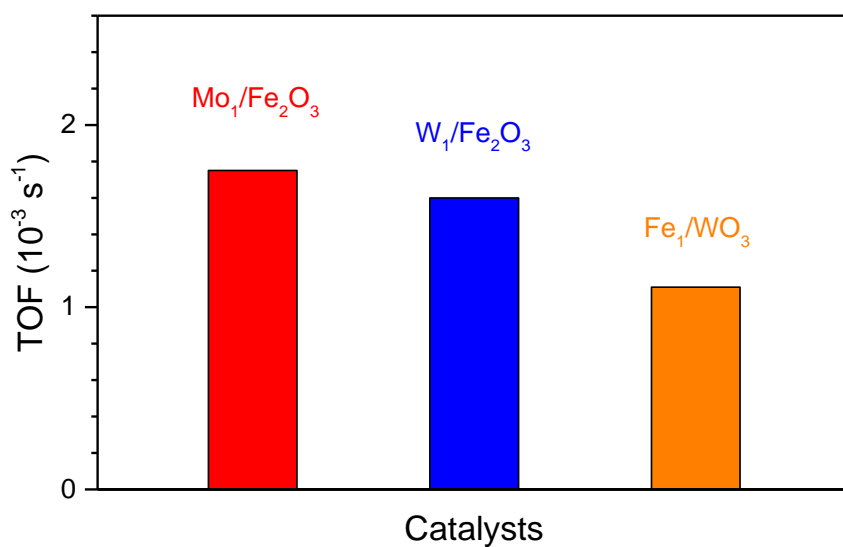

**Supplementary Figure 24.** TOFs over Mo<sub>1</sub>/Fe<sub>2</sub>O<sub>3</sub> (red), W<sub>1</sub>/Fe<sub>2</sub>O<sub>3</sub> (blue), and Fe<sub>1</sub>/WO<sub>3</sub> (orange) at 270 °C. Reaction conditions: 500 ppm NO, 500 ppm NH<sub>3</sub>, 3 vol% O<sub>2</sub>, balance N<sub>2</sub>, and GHSV 800,000 h<sup>-1</sup>.



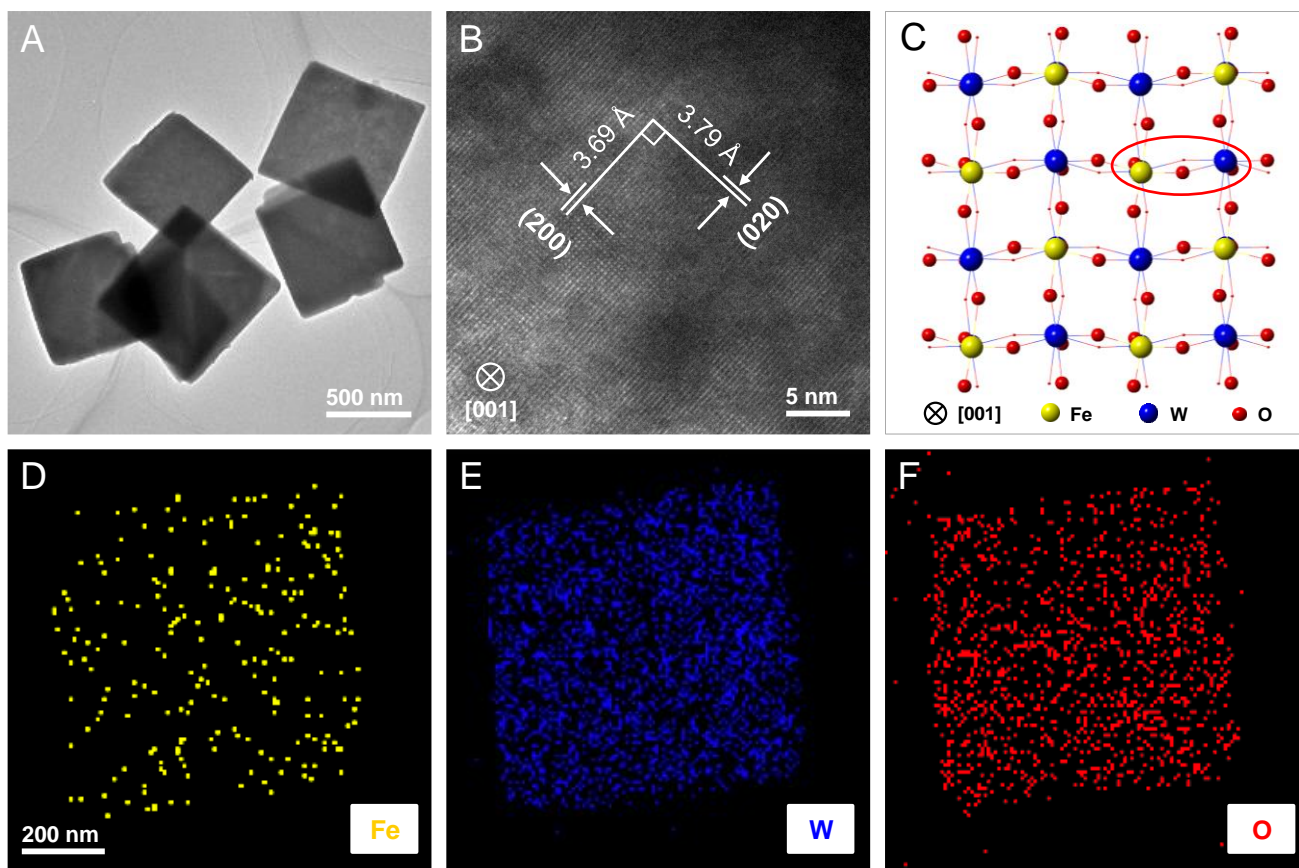

**Supplementary Figure 25.** (A) TEM and (B) HRTEM images of Fe<sub>1</sub>/WO<sub>3</sub>. (C) Structural model of Fe<sub>1</sub>/WO<sub>3</sub>. The yellow, blue and red balls represent Fe atoms, W atoms, and O atoms, respectively. The typical Fe<sub>1</sub>-W<sub>1</sub> dinuclear site is marked by red ellipse. (D-F) EDX mappings of Fe<sub>1</sub>/WO<sub>3</sub>.

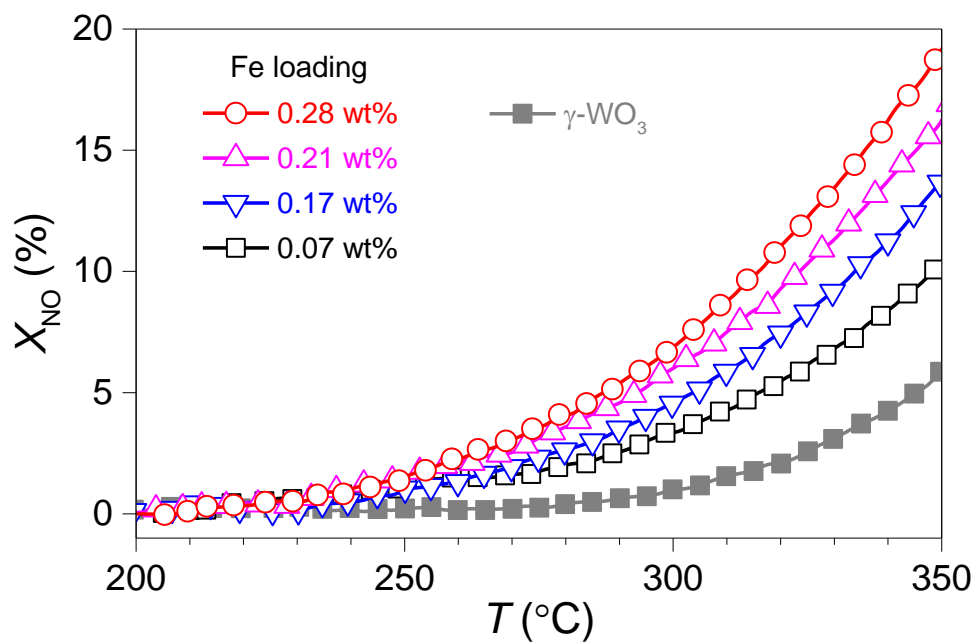

**Supplementary Figure 26.**  $X_{\text{NO}}$  as a function of temperature ( $T$ ) over  $\text{Fe}_1/\text{WO}_3$  with the different Fe loadings and  $\gamma\text{-WO}_3$ . Reaction conditions: 500 ppm NO, 500 ppm  $\text{NH}_3$ , 3 vol%  $\text{O}_2$ , balance  $\text{N}_2$ , and GHSV 800,000  $\text{h}^{-1}$ .

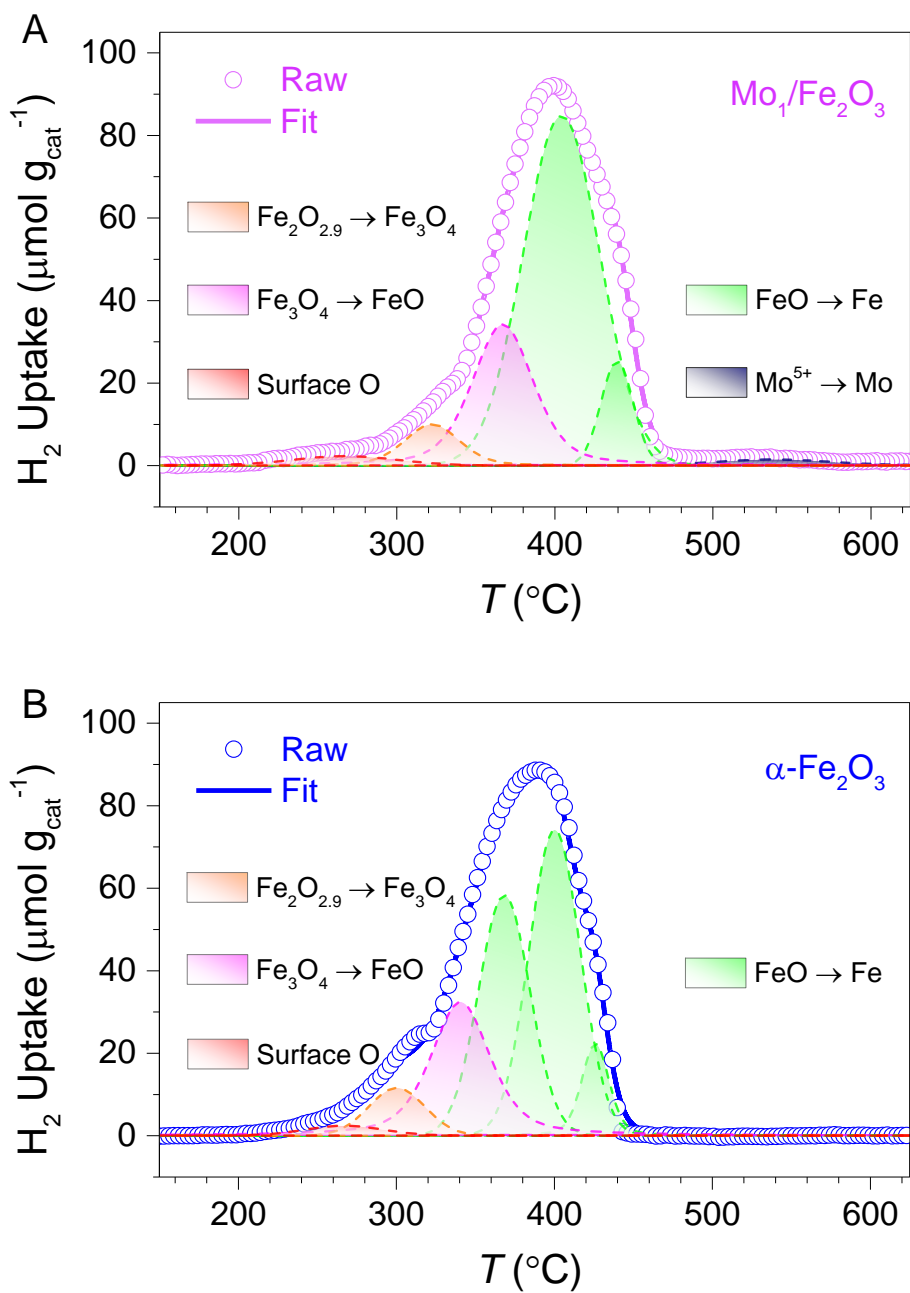

**Supplementary Figure 27.** The deconvoluted  $H_2$ -TPR profiles of (A)  $Mo_1/Fe_2O_3$  and (B)  $\alpha$ - $Fe_2O_3$ .

---

## Supplementary References

1. Hartel, P., Rose, H. & Dinges, C. Conditions and reasons for incoherent imaging in STEM. *Ultramicroscopy* **63**, 93-114 (1996).
2. Ortalan, V., Uzun, A., Gates, B. C. & Browning, N. D. Towards full-structure determination of bimetallic nanoparticles with an aberration-corrected electron microscope. *Nat. Nanotechnol.* **5**, 843-847 (2010).
