# Supplementary material for: Single-atom catalysts reveal the dinuclear characteristic of active sites in NO selective reduction with NH3
Source: PubMed Central journal article supplement (PMC7093475; doi:10.1038/s41467-020-15261-5), 2020-03-24
Supplement: 41467_2020_15261_MOESM2_ESM.pdf [file 41467_2020_15261_MOESM2_ESM.pdf]

Reviewers' comments:

Reviewer #1 (Remarks to the Author):

This paper reported on single-site catalysts of Mo1/Fe2O3, W1/Fe2O3, and Fe1/WO3 for NH3-SCR. Basically, the manuscript was written well, but there are considerable issues in the present form. I recommend publishing after a major revision. I strongly request the below to improve this manuscript.

1. A decrease in surface defect oxygen (Figure S4).

The authors described that 'Blue shade represents a decrease of the surface defect oxygen after the Mo loading' in support information. However, this explanation is confusing. XPS can reflect the state of oxygen on the catalyst. The defect oxygen will not be observed directly by XPS. If the words of 'a decrease of the surface defect oxygen' means that oxygen occupied the lattice, the intensity should become higher for Mo1/Fe2O3.

2. Figure 1F

The overlap of O in Figure 1F is not meaningful. In addition, the color of Mo and O was similar. In this case, the overlap of Fe and Mo is enough to show the dispersion of Fe species as Figure 1F.

3. Distinguish of single Mo site and Mo1-Fe1 site

The distinguish between single Mo site and Mo1-Fe1 site is unclear. It is because we can see the same Mo1-Fe1 structure in single Mo site with the neighbor Fe site in Figure 1H. What is the difference and how to distinguish them?

4. The state of Mo

The XAFS analysis indicated that CN of Mo-O bond was 6. And Mo=O band was confirmed by the Raman. Also, MoO6H was observed by FT-IR on page 8. The MoO6 motif terminated with Mo=O bond will be Mo6+. And MoO6 motif should be octahedra structure in the crystal. But Fe2O3 array is different from octahedra motif. How Mo was anchored in Fe2O3 array as MoO6 motif?

5. Bronsted acid site

I agree that the MoO6H function as Bronsted acid site. However, the importance of Lewis acid site is also pointed out from many publications. How did the author exclude the contribution of Lewis acid site?

6. N balance in catalytic test

The authors monitored NO, NO2 by NOx meter. But the authors didn't check N2, N2O, and NH3 for the catalytic test. The consumption ratio of NH3 and NO should be checked. And the formation of N2O or N2 should be checked to make sure the N balance. Sometimes, the formation of N2O will be observed when we use the new catalysts.

7. The comparison of the reference catalyst

The authors described that the 'calculated TOFs (converted NO molecules per ACS per second) to be  $\sim 1.7 \times 10^{-3} \text{ s}^{-1}$  at 270 oC (Figure S16), comparable to the TOF values ( $1.3 \times 10^{-3} \text{ s}^{-1}$  at 277 oC,  $2.4 \times 10^{-3} \text{ s}^{-1}$  at 323 oC) of V2O5/TiO2' in page 11. The loading amount of V2O5 for the commercial catalyst of V2O5/TiO2 was 0.5 wt% to 9 wt% depending on the application. And the TOF of Mo1/Fe2O3 was comparable to V2O5/TiO2. In the case of ca 1wt% V2O5/TiO2, it shows the almost full conversion at more than 350 oC. Why the catalytic activity of the Mo1/Fe2O3 catalyst was lower than that of the V2O5/TiO2 although the TOF value was similar.

8. The comparison of TOF

The authors reported Mo<sub>1</sub>/Fe<sub>2</sub>O<sub>3</sub>, W<sub>1</sub>/Fe<sub>2</sub>O<sub>3</sub>, and Fe<sub>1</sub>/WO<sub>3</sub>. The simple comparison of the TOF value of these catalysts should be added for the benefit of readers.

#### 9. Water and SO<sub>2</sub> tolerance

The influence of water on catalytic activity should be tested. The addition of water affects both catalytic activity and reaction mechanism.

Also the SO<sub>2</sub> tolerance of this material should be tested and mentioned.

#### Reviewer #2 (Remarks to the Author):

This is a very nice paper describing the synthesis, characterization and reactivity of atomically dispersed catalysts for NO SCR. Specific focus is given to the need of active sites with a combination of acidity and redox properties. To achieve this, acidic species (MoO<sub>x</sub> or WO<sub>x</sub>) are dispersed on a redox active support (Fe<sub>2</sub>O<sub>3</sub>), or a redox active site (FeO<sub>x</sub>) was anchored on an acidic support WO<sub>3</sub>. The characterization is very nice and the linear site density-reactivity relationships are convincing in assigning the active sites and their homogeneity. The paper is recommended for publication with only minor issues to address.

1. The paper is beautifully written. Although, some wording could be improved. For example, between pg 3 and 4 the use of "plenty of" should be modified.

2. The STEM data in Figure 4D is not as convincingly assigned as was seen for Figure 1g. Specifically, it seems like many more W species may exist in neighboring sites just based on scattering intensity. This should be clarified with some discussion.

3. The wording of dinuclear should be clarified. For example, in M on Fe<sub>2</sub>O<sub>3</sub> the M atom has 3 neighboring Fe species, so the idea of a dinuclear species doesn't completely make sense. For example, recent work has specifically synthesized dinuclear active sites that don't involve cations from the support (see ACS Catal. 2019, 9, 12, 10899-10912). This comment is not meant to take away from the current paper, just to suggest that the authors clarify the structure of the sites described here compared to other recent reports.

## I. Reply to the reviewers

We thank the editor and the reviewers for carefully reviewing our manuscript. We have revised the manuscript carefully, according to the reviewers' comments. Below is a point-by-point response to the reviewers' comments.

### Reviewer #1

*This paper reported on single-site catalysts of  $\text{Mo}_1/\text{Fe}_2\text{O}_3$ ,  $\text{W}_1/\text{Fe}_2\text{O}_3$ , and  $\text{Fe}_1/\text{WO}_3$  for  $\text{NH}_3$ -SCR. Basically, the manuscript was written well, but there are considerable issues in the present form. I recommend publishing after a major revision. I strongly request the below to improve this manuscript.*

#### ***Comment 1.1: A decrease in surface defect oxygen (Figure S4).***

*The authors described that 'Blue shade represents a decrease of the surface defect oxygen after the Mo loading' in Supporting Information. However, this explanation is confusing. XPS can reflect the state of oxygen on the catalyst. The defect oxygen will not be observed directly by XPS. If the words of 'a decrease of the surface defect oxygen' means that oxygen occupied the lattice, the intensity should become higher for  $\text{Mo}_1/\text{Fe}_2\text{O}_3$ .*

**Reply 1.1:** Thank the reviewer for the good comments. We agreed that the explanation about the O 1s XPS is confusing, which possibly originates from the different definitions of defect oxygen. Some researchers defined the oxygen vacancy as defect oxygen (*ACS Appl. Mater. Interfaces*, **2014**, 6, 12505–12514; *ACS Appl. Mater. Interfaces*, **2016**, 8, 33765–33774), while others defined surface oxygen with the low coordination number as the defect oxygen (*Phys. Chem. Chem. Phys.*, **2000**, 2, 1319–1324; *Electrochim. Acta*, **2017**, 229, 229–238; *ACS Sustainable Chem. Eng.*, **2019**, 7, 12117–12124). We agreed with the reviewer that it is more suitable to define oxygen vacancy as the defect oxygen, which thus cannot be observed directly by XPS. As a result, we modified the manuscript as “As further analyzed by the selected-area intensity surface plot and the corresponding structural model (Figures 1H and S3)”

and deleted the Figure S4 in the revised Supporting Information.

**Comment 1.2: Figure 1F.**

*The overlap of O in Figure 1F is not meaningful. In addition, the color of Mo and O was similar. In this case, the overlap of Fe and Mo is enough to show the dispersion of Fe species as Figure 1F.*

**Reply 1.2:** According to the reviewer's suggestion, we have deleted the overlap of O in Figure 1F, and thus the dispersions of Mo and Fe species are clearly displayed in the revised Figure 1F.

**Comment 1.3: Distinguish of single Mo site and Mo<sub>1</sub>-Fe<sub>1</sub> site.**

*The distinguish between single Mo site and Mo<sub>1</sub>-Fe<sub>1</sub> site is unclear. It is because we can see the same Mo<sub>1</sub>-Fe<sub>1</sub> structure in single Mo site with the neighbor Fe site in Figure 1H. What is the difference and how to distinguish them?*

**Reply 1.3:** To clearly distinguish the single Mo site from the Mo<sub>1</sub>-Fe<sub>1</sub> site, we have changed the 'single Mo site' to the single Mo atom, according to the reviewer's comments in the revised manuscript. Meanwhile, we have also changed 'single-site' to 'single-atom' in the revised manuscript. As a consequence, the 'dinuclear Mo<sub>1</sub>-Fe<sub>1</sub> site' is used as the catalytically active site in the SCR process, which is consistent with the recent research (*Angew. Chem. Inter. Ed.*, **2019**, 58, 12609-12616).

**Comment 1.4: The state of Mo.**

*The XAFS analysis indicated that CN of Mo-O bond was 6. And Mo=O band was confirmed by the Raman. Also, MoO<sub>6</sub>H was observed by FT-IR on page 8. The MoO<sub>6</sub> motif terminated with Mo=O bond will be Mo<sup>6+</sup>. And MoO<sub>6</sub> motif should be octahedra structure in the crystal. But Fe<sub>2</sub>O<sub>3</sub> array is different from octahedra motif. How Mo was anchored in Fe<sub>2</sub>O<sub>3</sub> array as MoO<sub>6</sub> motif?*

**Reply 1.4:** As commented by the reviewer, the XAFS analysis indicated that CN of Mo-O bond was 6, and Mo=O band was confirmed by the Raman. Also, MoO<sub>6</sub>H was

observed by FT-IR on page 8. We determined the oxidation state of Mo species to be  $\text{Mo}^{5+}$  in  $\text{Mo}_1/\text{Fe}_2\text{O}_3$  by combining the Mo 3d X-ray photoelectron spectra (Figure S7) with the Mo  $L_3$ -edge X-ray absorption spectra (Figure 2B). Although the oxidation states of Mo species are associated with the Mo=O bonding model, the oxidation states of Mo in  $\text{MoO}_6$  motif with Mo=O bonds might be +5 or +6 (*Appl. Surf. Sci.*, **1989**, 40, 179-181; *Appl. Catal. B*, **1998**, 3, 245-258; *Science*, **2015**, 348, 686-690).

Generally,  $\text{MoO}_6$  motif is the octahedral structure in the  $\alpha$ - $\text{MoO}_3$  crystal, as confirmed by the Mo  $L_3$ -edge X-ray absorption spectra of  $\alpha$ - $\text{MoO}_3$  in Figure 2B. Meanwhile, the  $\text{FeO}_6$  motif in the  $\alpha$ - $\text{Fe}_2\text{O}_3$  crystal is also the octahedral structure (*Chem. Mater.*, **2011**, 23, 14, 3255-3272), although  $\text{FeO}_6$  octahedral motif is slightly different from that of  $\text{MoO}_6$  octahedral motif due to the different size of metal ions and their electronic configurations. As for  $\text{Mo}_1/\text{Fe}_2\text{O}_3$ , we compared the Mo  $L_3$ -edge X-ray absorption spectra of  $\text{Mo}_1/\text{Fe}_2\text{O}_3$  with two reference samples with different symmetry, i.e.  $\alpha$ - $\text{MoO}_3$  with a  $\text{MoO}_6$  octahedral symmetry and  $\text{Fe}_2(\text{MoO}_4)_3$  with a  $\text{MoO}_4$  tetrahedral symmetry, in Figure 2B. The results demonstrated that the  $\text{MoO}_6$  motif of  $\text{Mo}_1/\text{Fe}_2\text{O}_3$  is a distorted octahedral structure, as confirmed by these data of the AC-STEM image (Figure 1), the EXAFS data (Figure 2A) and the Raman evidence (Figure S6).

On the  $\alpha$ - $\text{Fe}_2\text{O}_3(001)$  surface (Figure S2D), there are abundant three-fold hollow sites formed by three surface lattice oxygen atoms, which serve as suitable sites for anchoring Mo ions. As confirmed in the manuscript, the anchored Mo ion has three surface dangling bonds besides three Mo-O bonds formed with three oxygen ions of the anchoring site to form a distorted  $\text{MoO}_6$  octahedral structure. Thus, Mo can be anchored as the distorted  $\text{MoO}_6$  octahedral structure motif on the  $\alpha$ - $\text{Fe}_2\text{O}_3(001)$  surface, though we did not know the accurate geometric structure.

***Comment 1.5: Brønsted acid site.***

*I agree that the  $\text{MoO}_6\text{H}$  functions as Brønsted acid site. However, the importance of Lewis acid site is also pointed out from many publications. How did the author*

*exclude the contribution of Lewis acid site?*

**Reply 1.5:** Brønsted acid site plays an important role in the SCR process, which has been evidenced by many researchers (*Science*, **1994**, 265, 1217-1219; *J. Catal.*, **1995**, 151, 226-240; *J. Catal.*, **2017**, 346, 188-197; *J. Am. Chem. Soc.*, **2017**, 139, 15624-15627). According to the reaction mechanism (*J. Phys. Chem.*, **1987**, 91, 5921-5927), Brønsted acid sites and Lewis acid sites could transform from one to the other during the SCR reaction process (*J. Catal.*, **2020**, 382, 269–279), indicating that both Brønsted acid sites and Lewis acid sites participate in the SCR reactions. According to the reviewer’s suggestion, we have added the *in situ* DRIFT spectra collected at the SCR reaction temperature of 250 °C into the revised Supporting Information. As shown in Figure S10, the Lewis acid sites can be observed during the SCR reaction process. Accordingly, the manuscript has been revised as “Thus, each isolated Mo ion due to the formation of a MoO<sub>6</sub>H species can provide one Brønsted acid site<sup>23</sup>, which can transform to the Lewis acidic site during the SCR reactions<sup>24</sup> (Figure S10).”

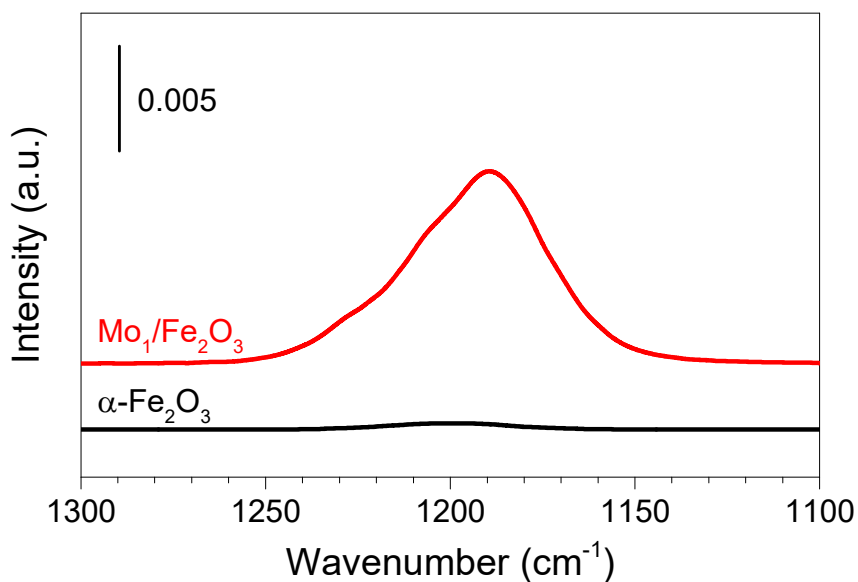

**Figure R1.** DRIFT spectra of NH<sub>3</sub> adsorption on Mo<sub>1</sub>/Fe<sub>2</sub>O<sub>3</sub> and α-Fe<sub>2</sub>O<sub>3</sub> at 250 °C.

**Comment 1.6:** *N balance in catalytic test.*

The authors monitored NO, NO<sub>2</sub> by NO<sub>x</sub> meter. But the authors didn't check N<sub>2</sub>, N<sub>2</sub>O, and NH<sub>3</sub> for the catalytic test. The consumption ratio of NH<sub>3</sub> and NO should be checked. And the formation of N<sub>2</sub>O or N<sub>2</sub> should be checked to make sure the N balance. Sometimes, the formation of N<sub>2</sub>O will be observed when we use the new catalysts.

**Reply 1.6:** As the reviewer suggested, we have recorded the NH<sub>3</sub> and NO conversions of Mo<sub>1</sub>/Fe<sub>2</sub>O<sub>3</sub> together with  $\alpha$ -Fe<sub>2</sub>O<sub>3</sub> in the SCR process. As shown in Figure R2A, the conversions of NH<sub>3</sub> and NO over Mo<sub>1</sub>/Fe<sub>2</sub>O<sub>3</sub> are almost the same as each other, in the whole temperature range. We further recorded the concentrations of N<sub>2</sub>O (Figure R2B) and the concentrations of NO<sub>2</sub> can be ignored, from which we calculated the N<sub>2</sub> selectivity as shown in Figure R2C. The results demonstrated that Mo<sub>1</sub>/Fe<sub>2</sub>O<sub>3</sub> has high catalytic activity and selectivity. In contrast, for  $\alpha$ -Fe<sub>2</sub>O<sub>3</sub>, the conversion of NO decreased rapidly and became lower than that of NH<sub>3</sub> above 300 °C, as shown in Figure R2D, which suggested that the NH<sub>3</sub> was oxidized to NO by  $\alpha$ -Fe<sub>2</sub>O<sub>3</sub> at high temperatures. Meanwhile, as the temperature increases, N<sub>2</sub>O concentration over  $\alpha$ -Fe<sub>2</sub>O<sub>3</sub> increases (Figure R2B), leading to the low selectivity to N<sub>2</sub> (Figure R2C). We have added these results into the revised Supporting Information as Figure S12.

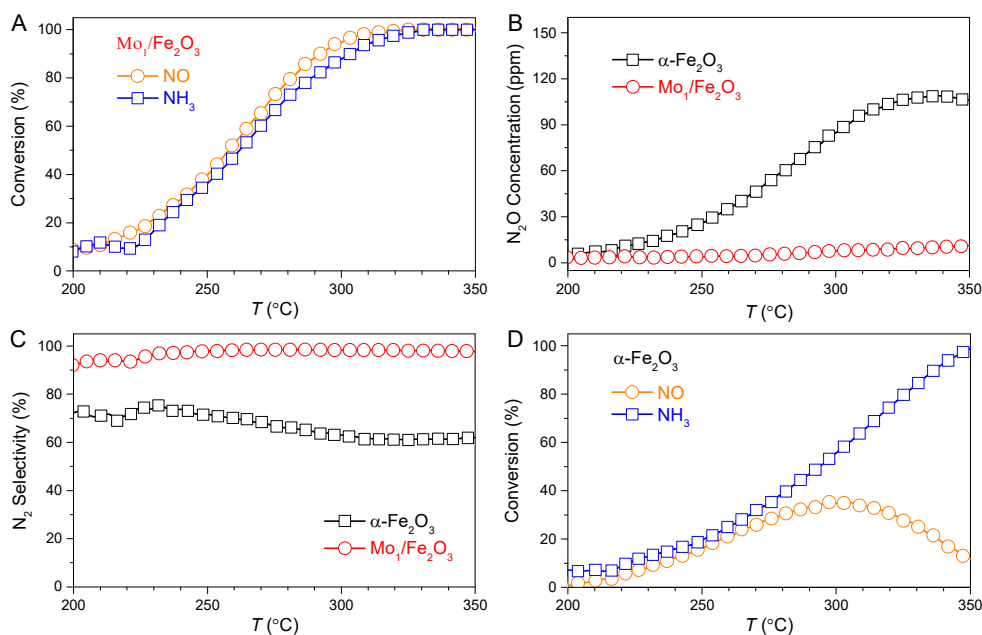

**Figure R2.** SCR performance as a function of temperature (*T*): (A) NO and NH<sub>3</sub>

conversion over Mo<sub>1</sub>/Fe<sub>2</sub>O<sub>3</sub>. (B) N<sub>2</sub>O concentration over α-Fe<sub>2</sub>O<sub>3</sub> and Mo<sub>1</sub>/Fe<sub>2</sub>O<sub>3</sub>. (C) N<sub>2</sub> selectivity over α-Fe<sub>2</sub>O<sub>3</sub> and Mo<sub>1</sub>/Fe<sub>2</sub>O<sub>3</sub>. (D) NO and NH<sub>3</sub> conversion over α-Fe<sub>2</sub>O<sub>3</sub>. Reaction conditions: 500 ppm NO, 500 ppm NH<sub>3</sub>, 3 vol% O<sub>2</sub>, balance N<sub>2</sub>, and GHSV 66,000 h<sup>-1</sup>.

**Comment 1.7: The comparison of the reference catalyst.**

*The authors described that the ‘calculated TOFs (converted NO molecules per ACS per second) to be  $\sim 1.7 \times 10^{-3} \text{ s}^{-1}$  at 270 °C (Figure S16), comparable to the TOF values ( $1.3 \times 10^{-3} \text{ s}^{-1}$  at 277 °C,  $2.4 \times 10^{-3} \text{ s}^{-1}$  at 323 °C) of V<sub>2</sub>O<sub>5</sub>/TiO<sub>2</sub>’ in page 11. The loading amount of V<sub>2</sub>O<sub>5</sub> for the commercial catalyst of V<sub>2</sub>O<sub>5</sub>/TiO<sub>2</sub> was 0.5 wt% to 9 wt% depending on the application. And the TOF of Mo<sub>1</sub>/Fe<sub>2</sub>O<sub>3</sub> was comparable to V<sub>2</sub>O<sub>5</sub>/TiO<sub>2</sub>. In the case of ca 1wt% V<sub>2</sub>O<sub>5</sub>/TiO<sub>2</sub>, it shows the almost full conversion at more than 350 °C. Why the catalytic activity of the Mo<sub>1</sub>/Fe<sub>2</sub>O<sub>3</sub> catalyst was lower than that of the V<sub>2</sub>O<sub>5</sub>/TiO<sub>2</sub> although the TOF value was similar.*

**Reply 1.7:** Depending on the reaction conditions such as the reaction temperatures and the gas hourly space velocity (GHSV), catalytic activities are often different over different catalyst systems, although they hold the same TOF. In particular, one important factor governing the different activities between Mo<sub>1</sub>/Fe<sub>2</sub>O<sub>3</sub> and V<sub>2</sub>O<sub>5</sub>/TiO<sub>2</sub> is the difference of their GHSVs. In current work, GHSV was calculated to be as high as 600,000 mL g<sup>-1</sup> h<sup>-1</sup>, whereas the reported values of the V<sub>2</sub>O<sub>5</sub>/TiO<sub>2</sub> catalysts are only 22,500 mL g<sup>-1</sup> h<sup>-1</sup> (*J. Catal.*, **1994**, 147, 241–249) and 45,000 mL g<sup>-1</sup> h<sup>-1</sup> (*J. Catal.*, **1999**, 187, 419–435). Therefore, it is the main reason why the catalytic activity of the Mo<sub>1</sub>/Fe<sub>2</sub>O<sub>3</sub> catalyst was lower than that of the V<sub>2</sub>O<sub>5</sub>/TiO<sub>2</sub> although the TOF value was similar.

**Comment 1.8: The comparison of TOF.**

*The authors reported Mo<sub>1</sub>/Fe<sub>2</sub>O<sub>3</sub>, W<sub>1</sub>/Fe<sub>2</sub>O<sub>3</sub>, and Fe<sub>1</sub>/WO<sub>3</sub>. The simple comparison of the TOF value of these catalysts should be added for the benefit of readers.*

**Reply 1.8:** As the reviewer suggested, the TOF values of Mo<sub>1</sub>/Fe<sub>2</sub>O<sub>3</sub>, W<sub>1</sub>/Fe<sub>2</sub>O<sub>3</sub>, and



Fe<sub>1</sub>/WO<sub>3</sub> were calculated from the 1.3 wt% Mo/Fe<sub>2</sub>O<sub>3</sub>, 2.0 wt% W/Fe<sub>2</sub>O<sub>3</sub>, and 0.28 wt% Fe/WO<sub>3</sub>, respectively (Figure R3), which were also added in the revised Supporting Information as Figure S24.

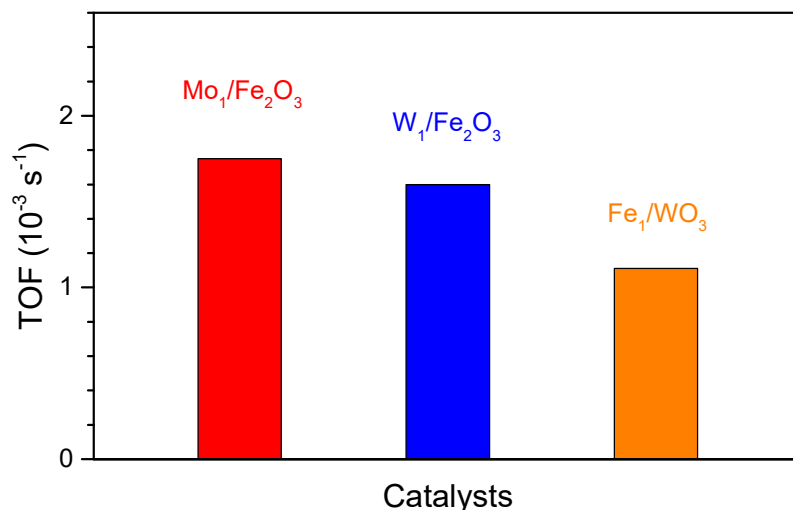

**Figure R3.** TOFs over Mo<sub>1</sub>/Fe<sub>2</sub>O<sub>3</sub>, W<sub>1</sub>/Fe<sub>2</sub>O<sub>3</sub>, and Fe<sub>1</sub>/WO<sub>3</sub> at 270 °C. Reaction conditions: 500 ppm NO, 500 ppm NH<sub>3</sub>, 3 vol% O<sub>2</sub>, balance N<sub>2</sub>, and GHSV 800,000 h<sup>-1</sup>.

**Comment 1.9: Water and SO<sub>2</sub> tolerance.**

*The influence of water on catalytic activity should be tested. The addition of water affects both catalytic activity and reaction mechanism. Also the SO<sub>2</sub> tolerance of this material should be tested and mentioned.*

**Reply 1.9:** According to the reviewer comments, we have tested the effect of water on catalytic activity of Mo<sub>1</sub>/Fe<sub>2</sub>O<sub>3</sub> after reaching a steady state. When H<sub>2</sub>O was added into the feed gas, the catalytic activity rapidly decreased from 92% to 70%, and then remained stable. However, after cutting off the supply of water, the catalytic activity rapidly restored to the original level. This result implied that the inhibiting effect of H<sub>2</sub>O on the activity of Mo<sub>1</sub>/Fe<sub>2</sub>O<sub>3</sub> was reversible. We have also tested the effect of SO<sub>2</sub>. Nearly no decrease of activity was observed after the addition of SO<sub>2</sub>, which indicated that Mo<sub>1</sub>/Fe<sub>2</sub>O<sub>3</sub> had a strong SO<sub>2</sub> tolerance. In real flue gases from industry, water and SO<sub>2</sub> usually co-exist, so we have tested the effect of H<sub>2</sub>O and SO<sub>2</sub>. The

result indicated the excellent H<sub>2</sub>O and/or SO<sub>2</sub> durability of Mo<sub>1</sub>/Fe<sub>2</sub>O<sub>3</sub>. We have added these results into the revised Supporting Information as Figure S13, and we revised the manuscript as: “and the Mo<sub>1</sub>/Fe<sub>2</sub>O<sub>3</sub> also showed excellent H<sub>2</sub>O and/or SO<sub>2</sub> durability (Figure S13)”.

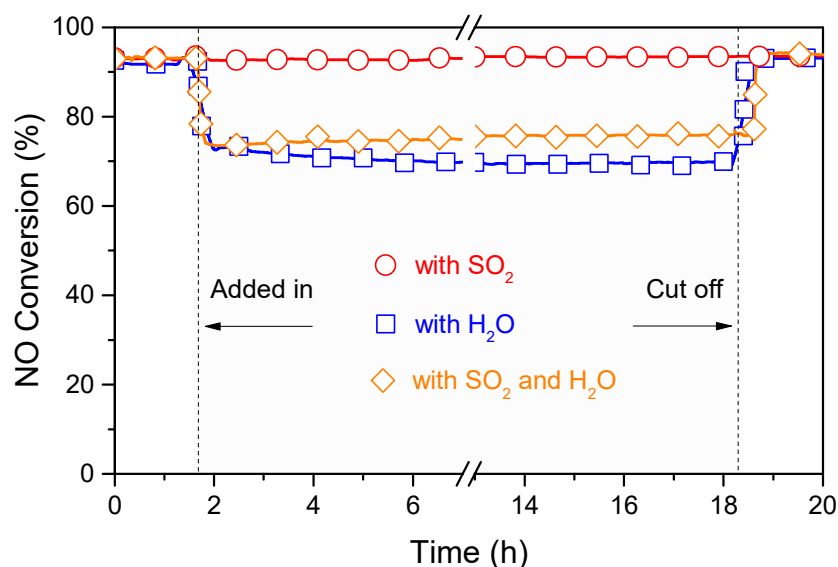

**Figure R4.** Effect of H<sub>2</sub>O and SO<sub>2</sub> on catalytic activity over Mo<sub>1</sub>/Fe<sub>2</sub>O<sub>3</sub> at 300 °C. Reaction conditions: 500 ppm NO, 500 ppm NH<sub>3</sub>, 3 vol% O<sub>2</sub>, 200 ppm SO<sub>2</sub> (when used), 5 vol% H<sub>2</sub>O (when used), balance N<sub>2</sub>, and GHSV 66,000 h<sup>-1</sup>.

## Reviewer #2

*This is a very nice paper describing the synthesis, characterization and reactivity of atomically dispersed catalysts for NO SCR. Specific focus is given to the need of active sites with a combination of acidity and redox properties. To achieve this, acidic species (MoO<sub>x</sub> or WO<sub>x</sub>) are dispersed on a redox active support (Fe<sub>2</sub>O<sub>3</sub>), or a redox active site (FeO<sub>x</sub>) was anchored on an acidic support WO<sub>3</sub>. The characterization is very nice and the linear site density-reactivity relationships are convincing in assigning the active sites and their homogeneity. The paper is recommended for publication with only minor issues to address.*

**Comment 2.1:** *The paper is beautifully written. Although, some wording could be*

improved. For example, between pg 3 and 4 the use of “plenty of” should be modified.

**Reply 2.1:** Thank the reviewer for the good comment. We have replaced “plenty of” by “abundant” in the revised manuscript.

**Comment 2.2:** The STEM data in Figure 4D is not as convincingly assigned as was seen for Figure 1g. Specifically, it seems like many more W species may exist in neighboring sites just based on scattering intensity. This should be clarified with some discussion.

**Reply 2.2:** As the reviewer suggested, we have taken the image intensity line scans in the areas, where W species seem to exist in neighboring sites. The intensity profiles revealed that the most W exists as isolated single atoms (Figure R5). We have added the result into the revised Supporting Information as Figure S19. It might also be the existence of adjacent W species, if so, these adjacent W species should not make a great contribution to our conclusion owing to a low activity in SCR reactions, as testified by the very low conversion on the two adjacent W sites of WO<sub>3</sub> in our work (Figure S26).

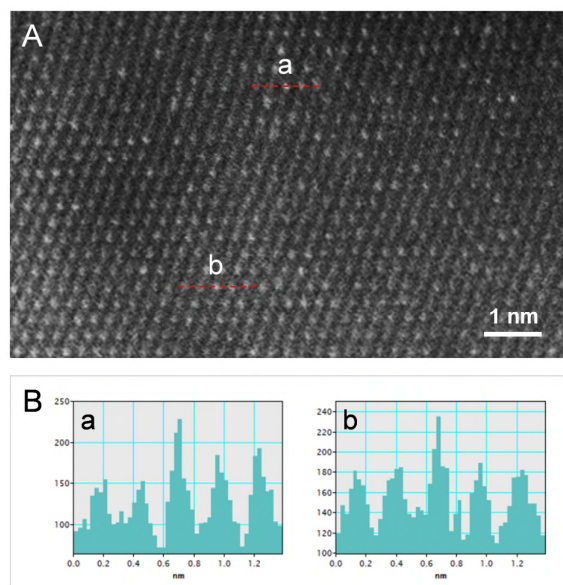

**Figure R5.** (A) AC-STEM image of W<sub>1</sub>/Fe<sub>2</sub>O<sub>3</sub>. (B) The image intensity line scans along the directions a and b shown in A.

**Comment 2.3:** *The wording of dinuclear should be clarified. For example, in M on Fe<sub>2</sub>O<sub>3</sub> the M atom has 3 neighboring Fe species, so the idea of a dinuclear species doesn't completely make sense. For example, recent work has specifically synthesized dinuclear active sites that don't involve cations from the support (see ACS Catal. 2019, 9, 12, 10899-10912). This comment is not meant to take away from the current paper, just to suggest that the authors clarify the structure of the sites described here compared to other recent reports.*

**Reply 2.3:** As the reviewer mentioned, on the Mo<sub>1</sub>/Fe<sub>2</sub>O<sub>3</sub> or W<sub>1</sub>/Fe<sub>2</sub>O<sub>3</sub> surfaces, each isolated Mo or W ion connects to three neighboring Fe ions bridged by the lattice oxygen (Figure S2), and thus one active catalytic site (ACS) might contain more than one Fe ions besides one Mo or W ion. To rule out this possibility, we anchored single Fe ions on (001) surfaces of  $\gamma$ -WO<sub>3</sub> nanosheets with a square morphology to achieve a single-atom Fe<sub>1</sub>/WO<sub>3</sub> catalyst (Figure S25). As the number of the single Fe ions increases, X<sub>NO</sub> over Fe<sub>1</sub>/WO<sub>3</sub> linearly increases, the trend of which is the same as that of W<sub>1</sub>/Fe<sub>2</sub>O<sub>3</sub> (Figure 4E). As a consequence, only single Fe ion is enough for one ACS of Mo<sub>1</sub>/Fe<sub>2</sub>O<sub>3</sub> or W<sub>1</sub>/Fe<sub>2</sub>O<sub>3</sub>. According to the reviewer's suggestion, we have also cited the paper (ACS Catal., 2019, 9, 12, 10899-10912) as Reference 17 to clarify the concept of dinuclear metal sites, as described in the revised manuscript: "An ideal structure is to fabricate dinuclear metal sites on supports<sup>17</sup>, which allows it to function as dual sites catalyzing SCR reaction, but it is a formidable task to synthesize such a catalyst."

REVIEWERS' COMMENTS:

Reviewer #1 (Remarks to the Author):

Now my questions were became clear.

Reviewer #2 (Remarks to the Author):

The authors nicely addressed all concerns. The paper can be published.

## **Response to the reviewers**

We thank the reviewers for carefully reviewing our manuscript. Below is a point-by-point response to the reviewers' comments.

### **Reviewer #1**

*Now my questions were became clear.*

**Response 1:** Thank you very much for your previous valuable comments, positive evaluation and publication recommendation on this work.

### **Reviewer #2**

*The authors nicely addressed all concerns. The paper can be published.*

**Response 2:** Thank you very much for your positive evaluation, all the previous valuable comments and publication recommendation on this work.
